# Supplementary material for: Tree Productivity Enhanced with Conversion from Forest to Urban Land Covers
Source: PubMed Central journal article supplement (PMC4547753; doi:10.1371/journal.pone.0136237), 2015-08-24

### Strong Response

Before =  $8.8 \text{ cm}^2 \text{ yr}^{-1}$ ; After =  $44.6 \text{ cm}^2 \text{ yr}^{-1}$   
p-value =  $8.5\text{e-}13$

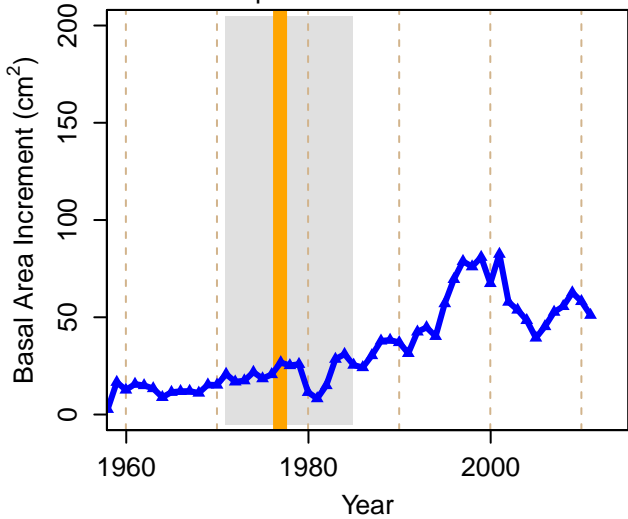

Before =  $1.4 \text{ cm}^2 \text{ yr}^{-1}$ ; After =  $4.5 \text{ cm}^2 \text{ yr}^{-1}$   
p-value =  $2.1\text{e-}05$

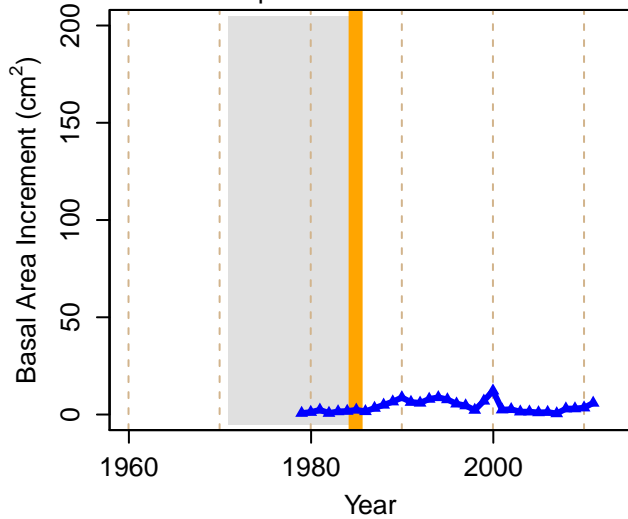

Before =  $5.3 \text{ cm}^2 \text{ yr}^{-1}$ ; After =  $29.5 \text{ cm}^2 \text{ yr}^{-1}$   
p-value =  $5.1\text{e-}11$

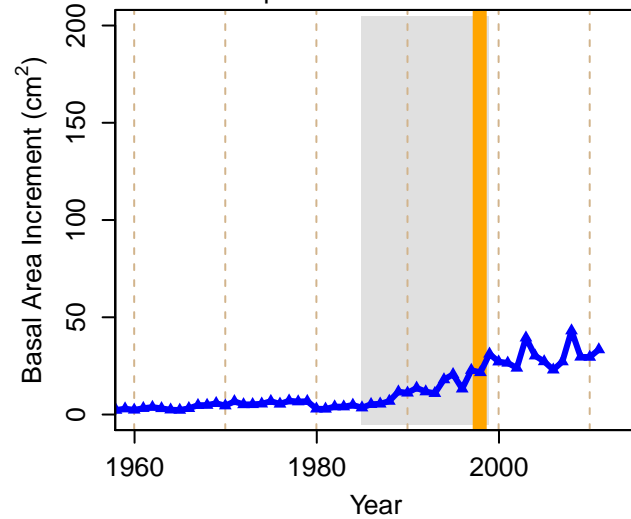

Before =  $29.2 \text{ cm}^2 \text{ yr}^{-1}$ ; After =  $108 \text{ cm}^2 \text{ yr}^{-1}$   
p-value =  $3.4\text{e-}09$

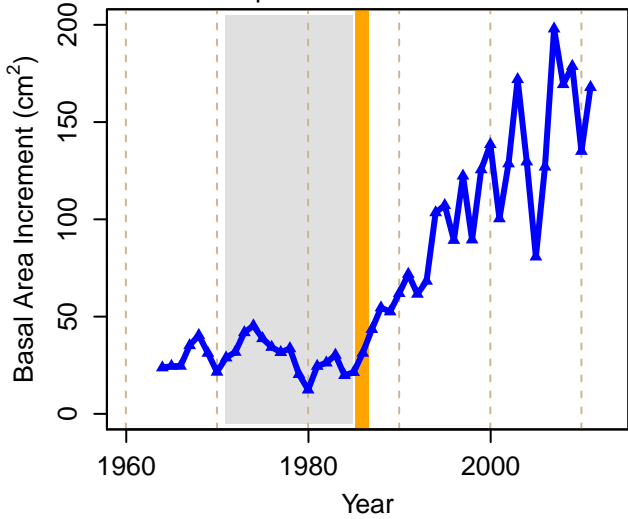

Before =  $10.1 \text{ cm}^2 \text{ yr}^{-1}$ ; After =  $30.8 \text{ cm}^2 \text{ yr}^{-1}$   
p-value =  $1\text{e-}12$

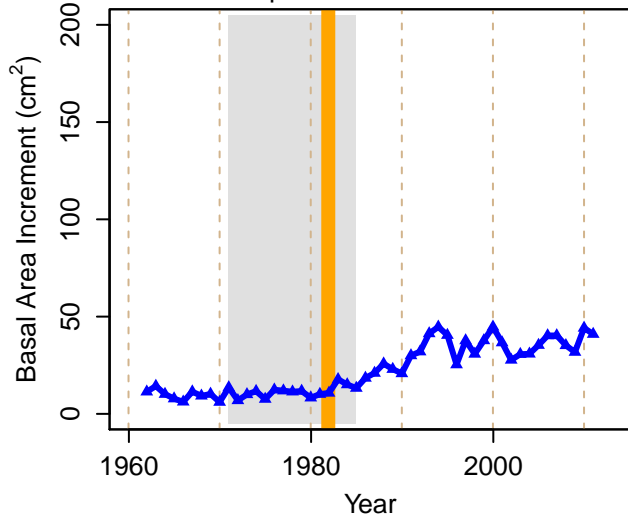

Before =  $3.8 \text{ cm}^2 \text{ yr}^{-1}$ ; After =  $18.5 \text{ cm}^2 \text{ yr}^{-1}$   
p-value =  $5.8\text{e-}12$

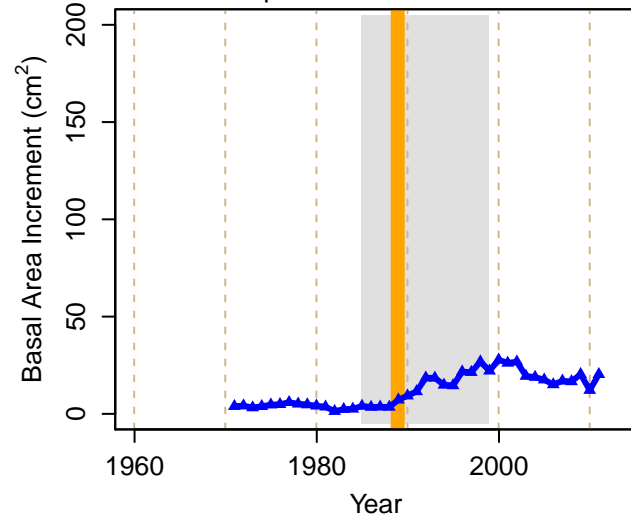

Before =  $20.9 \text{ cm}^2 \text{ yr}^{-1}$ ; After =  $70.4 \text{ cm}^2 \text{ yr}^{-1}$   
p-value =  $2.2\text{e-}07$

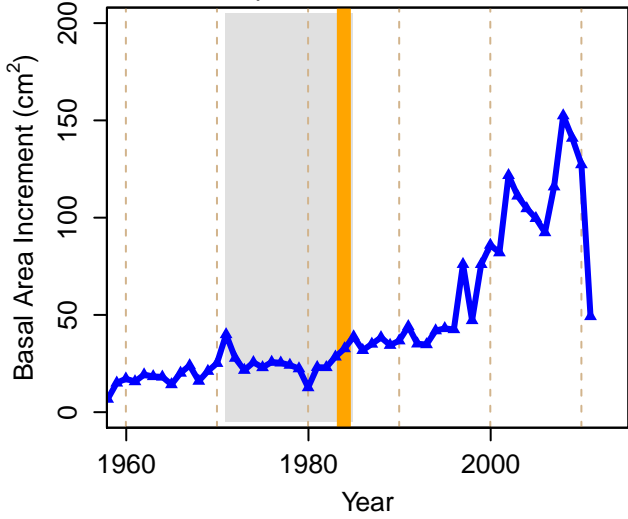

Before =  $7.5 \text{ cm}^2 \text{ yr}^{-1}$ ; After =  $32.7 \text{ cm}^2 \text{ yr}^{-1}$   
p-value =  $5.1\text{e-}11$

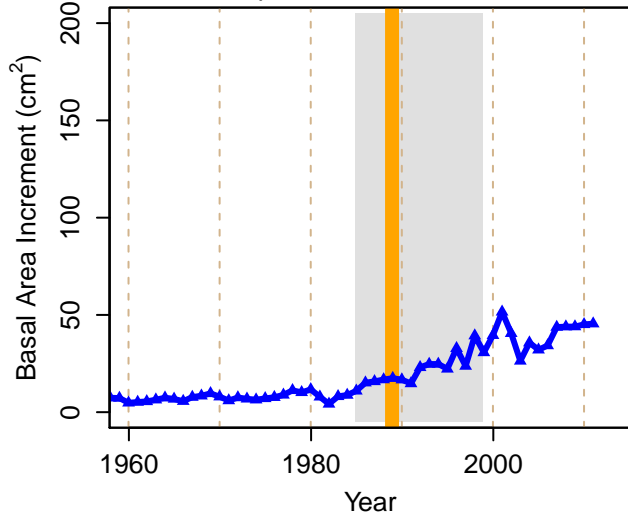

Before =  $5.3 \text{ cm}^2 \text{ yr}^{-1}$ ; After =  $29 \text{ cm}^2 \text{ yr}^{-1}$   
p-value =  $8.7\text{e-}15$

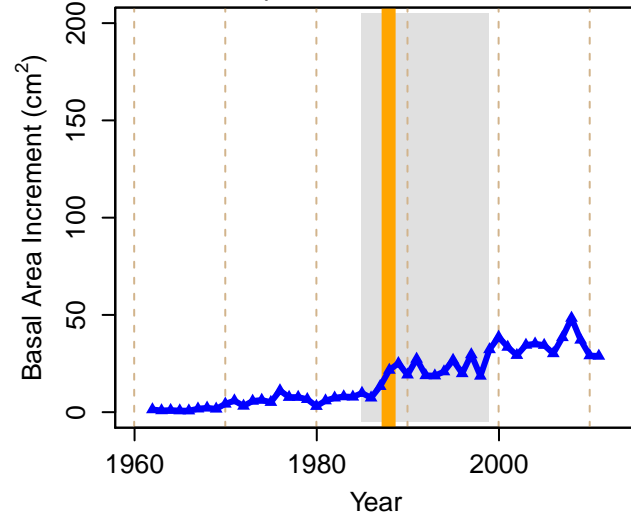

## Strong Response

Before =  $5.8 \text{ cm}^2 \text{ yr}^{-1}$ ; After =  $29.2 \text{ cm}^2 \text{ yr}^{-1}$   
p-value =  $5e-07$

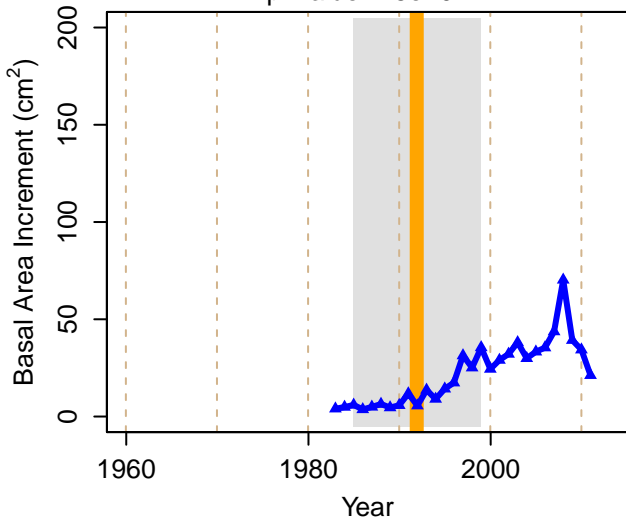

Before =  $5.1 \text{ cm}^2 \text{ yr}^{-1}$ ; After =  $16.4 \text{ cm}^2 \text{ yr}^{-1}$   
p-value =  $4.7e-04$

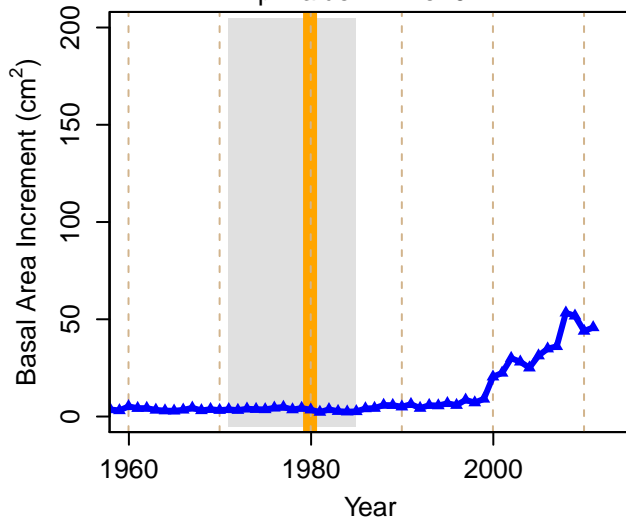

Before =  $21.1 \text{ cm}^2 \text{ yr}^{-1}$ ; After =  $73.5 \text{ cm}^2 \text{ yr}^{-1}$   
p-value =  $8.1e-07$

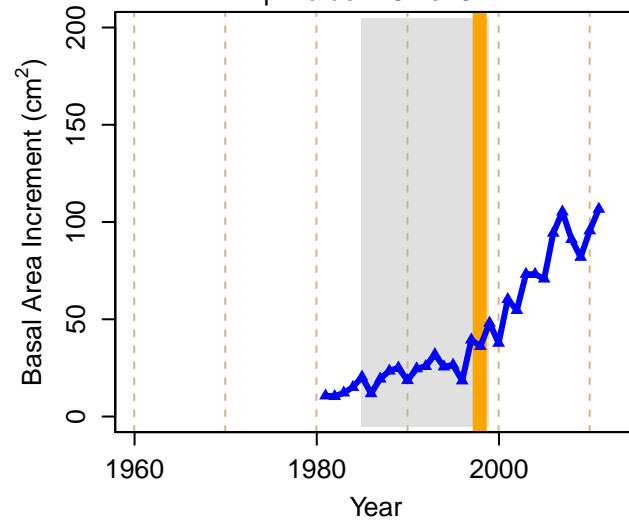

Before =  $15.9 \text{ cm}^2 \text{ yr}^{-1}$ ; After =  $48.3 \text{ cm}^2 \text{ yr}^{-1}$   
p-value =  $9.1e-04$

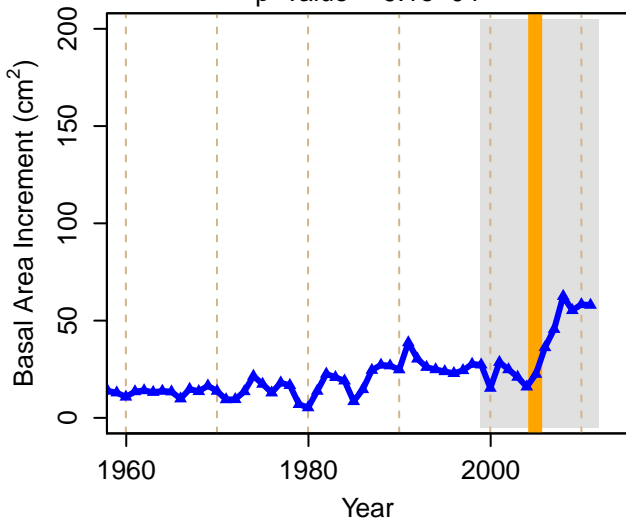

Before =  $1.6 \text{ cm}^2 \text{ yr}^{-1}$ ; After =  $29.9 \text{ cm}^2 \text{ yr}^{-1}$   
p-value =  $8.4e-13$

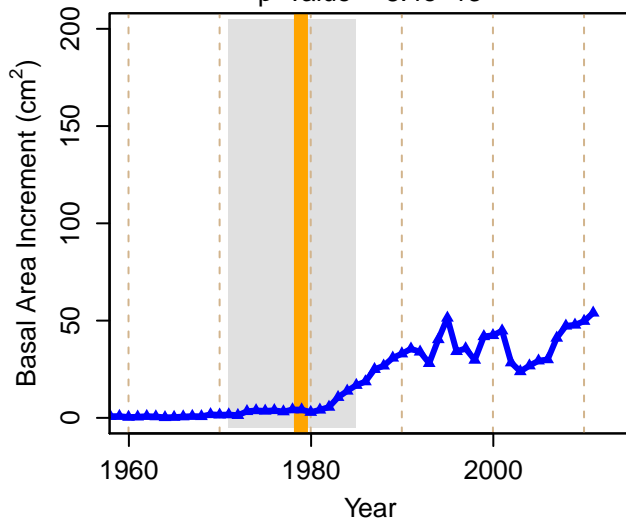

Before =  $6.5 \text{ cm}^2 \text{ yr}^{-1}$ ; After =  $46.9 \text{ cm}^2 \text{ yr}^{-1}$   
p-value =  $1.1e-03$

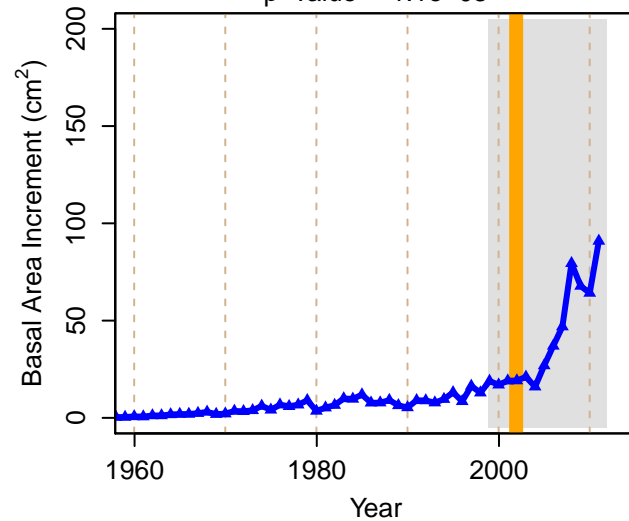

Before =  $8 \text{ cm}^2 \text{ yr}^{-1}$ ; After =  $27 \text{ cm}^2 \text{ yr}^{-1}$   
p-value =  $1.6e-13$

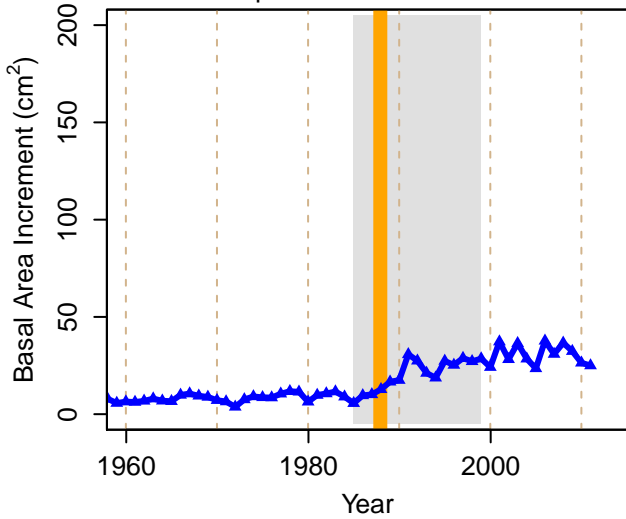

Before =  $10.9 \text{ cm}^2 \text{ yr}^{-1}$ ; After =  $51.2 \text{ cm}^2 \text{ yr}^{-1}$   
p-value =  $1.5e-16$

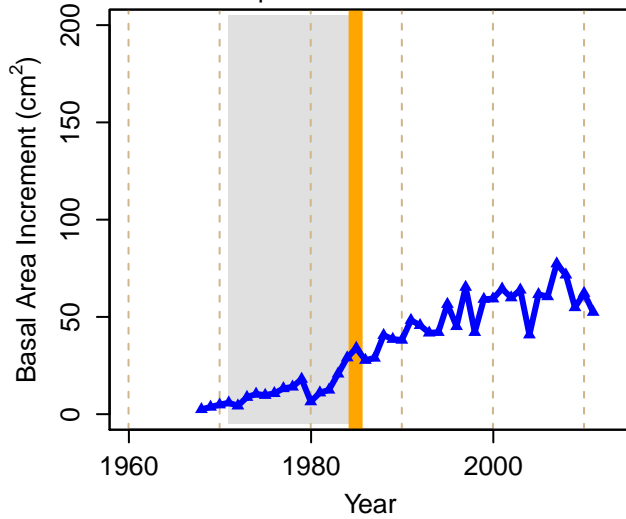

Before =  $6.8 \text{ cm}^2 \text{ yr}^{-1}$ ; After =  $27.2 \text{ cm}^2 \text{ yr}^{-1}$   
p-value =  $4.9e-07$

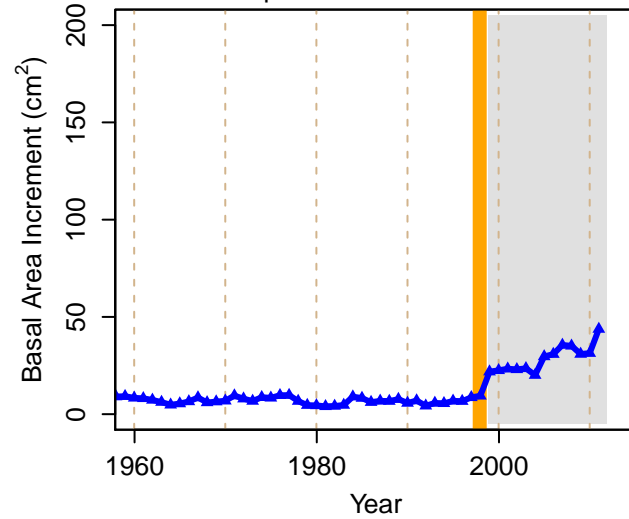

## Typical Response

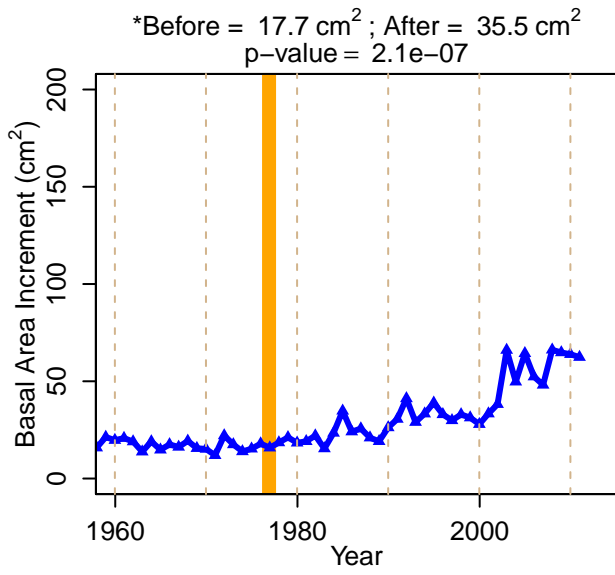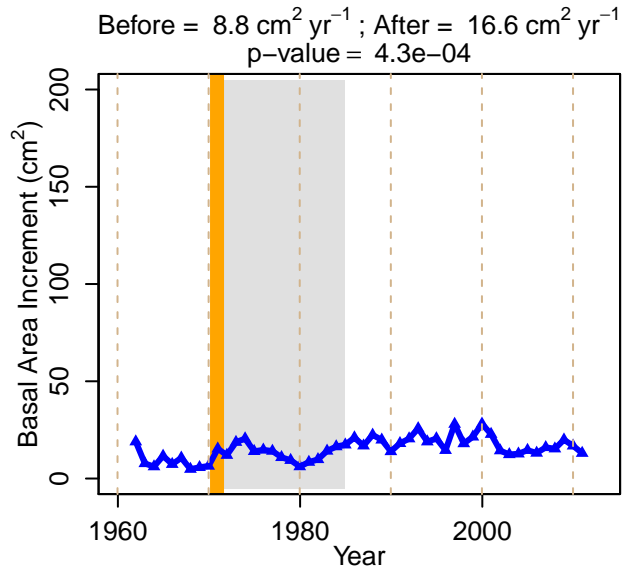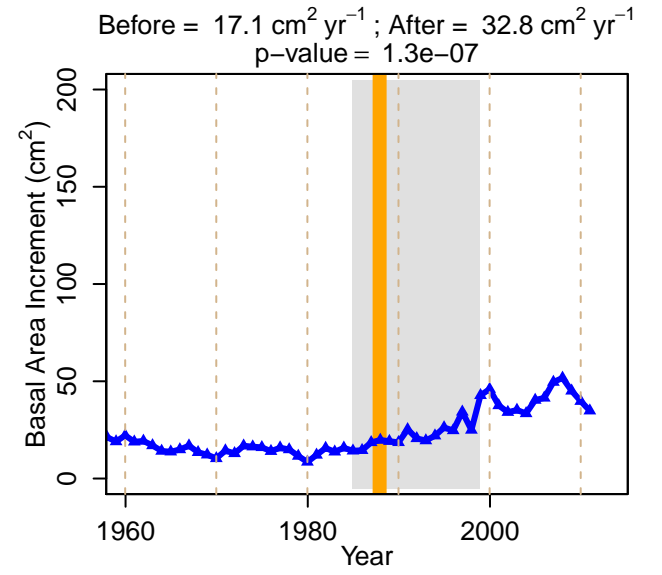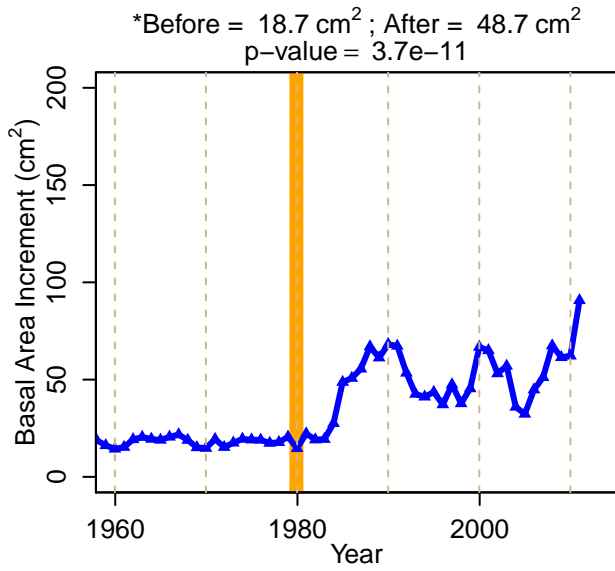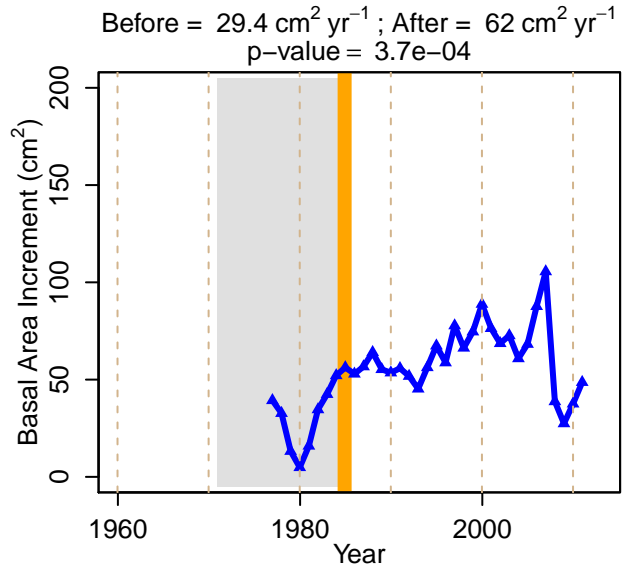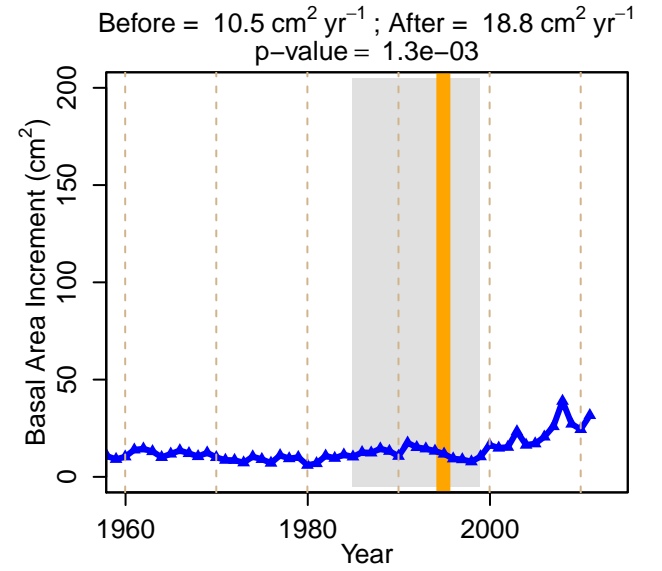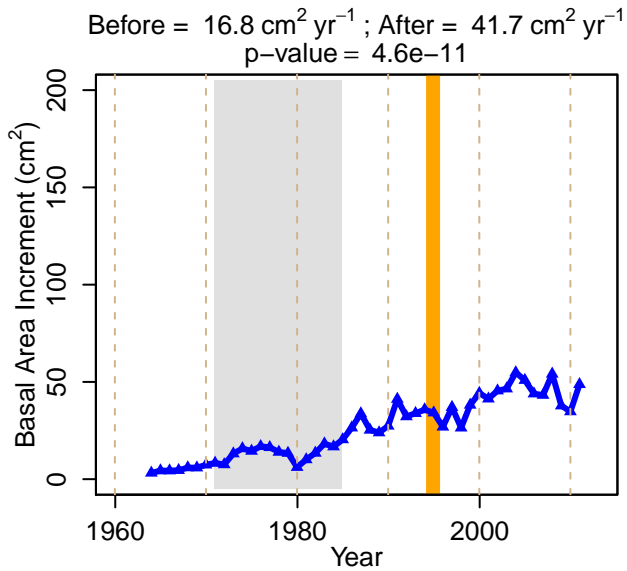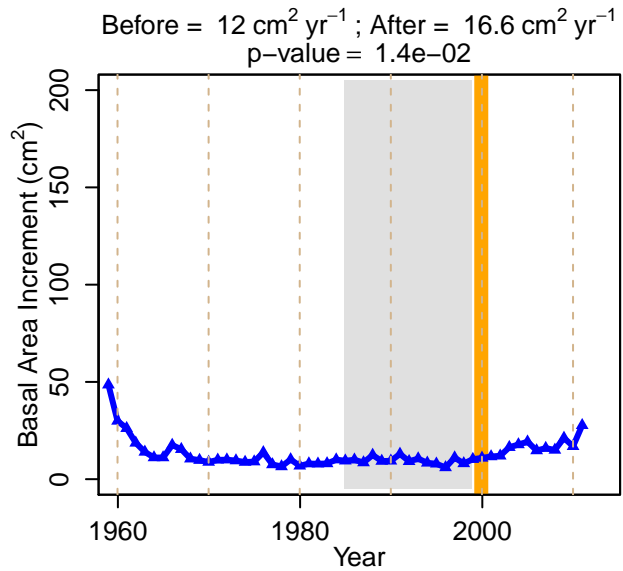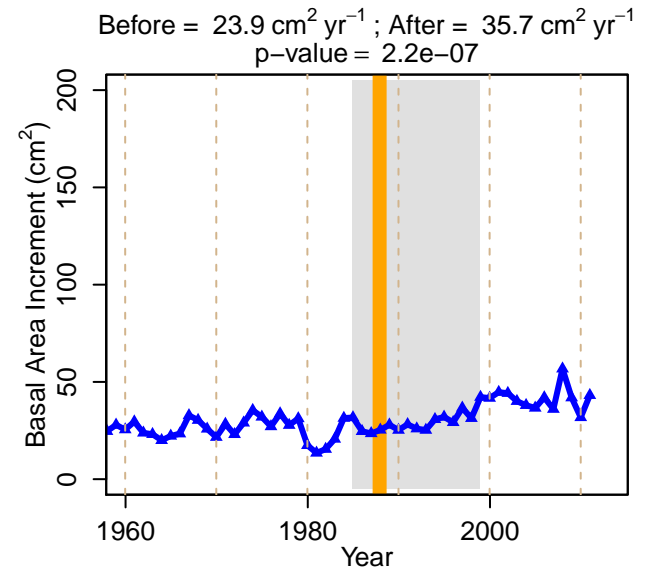

## Typical Response

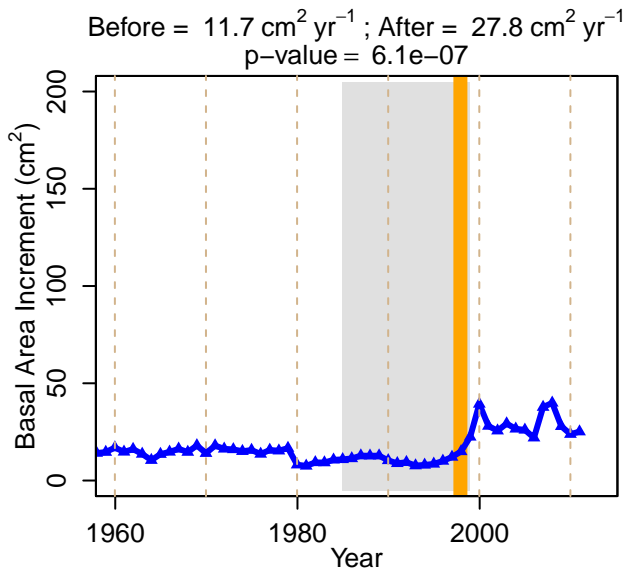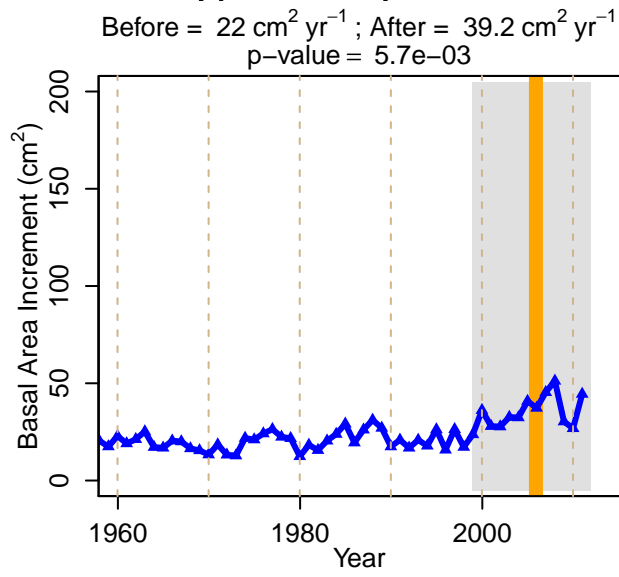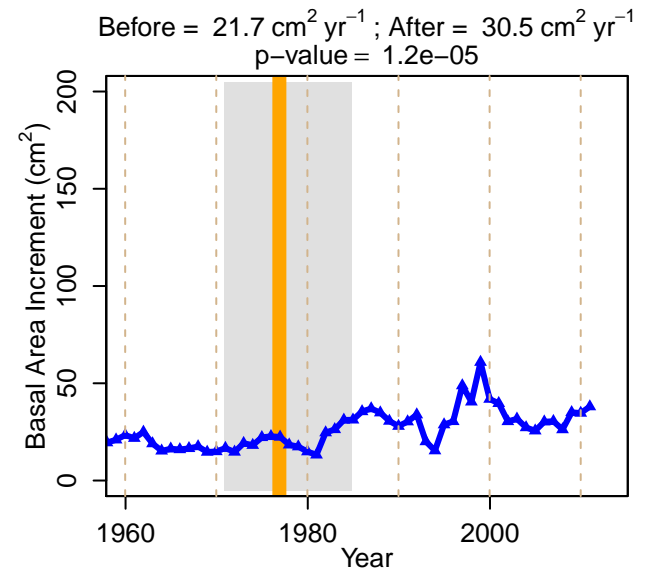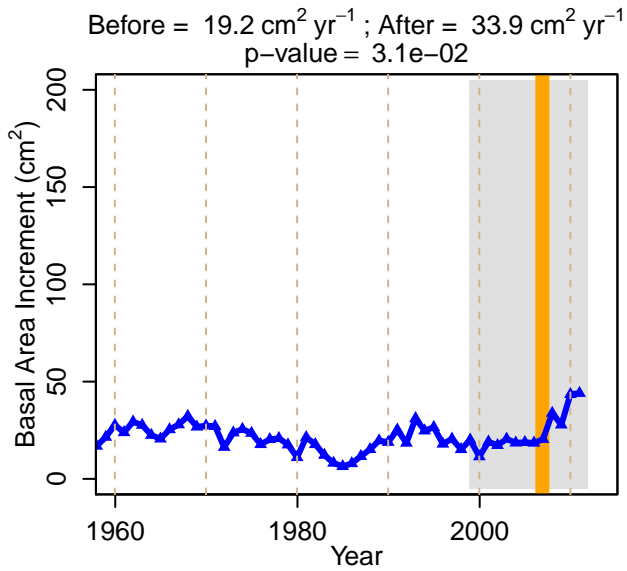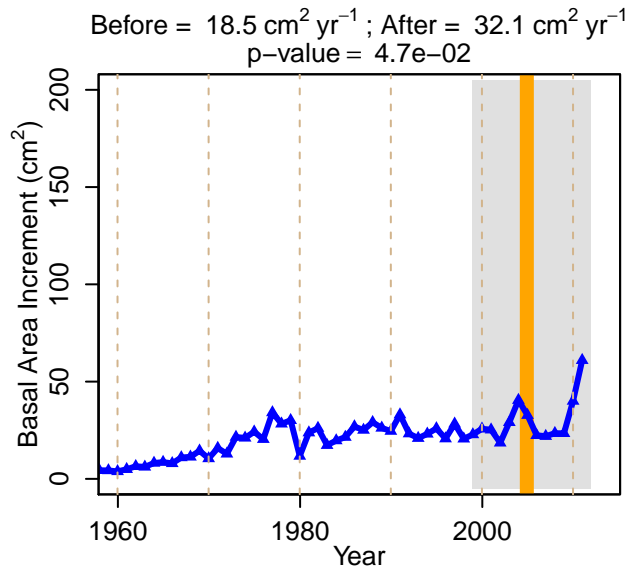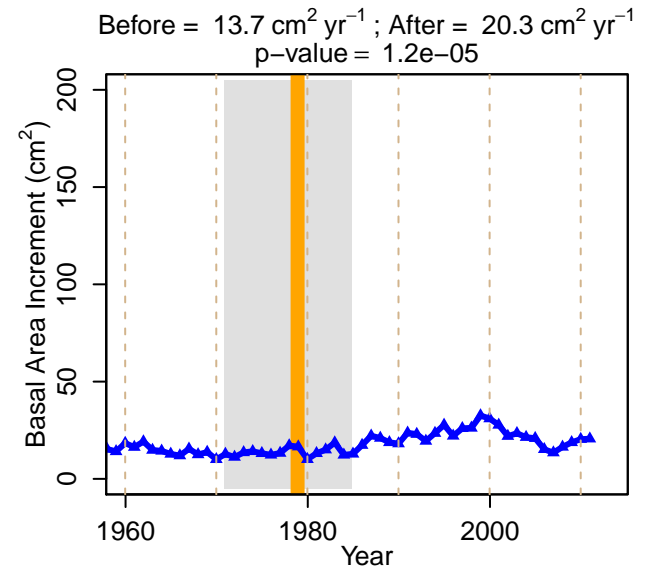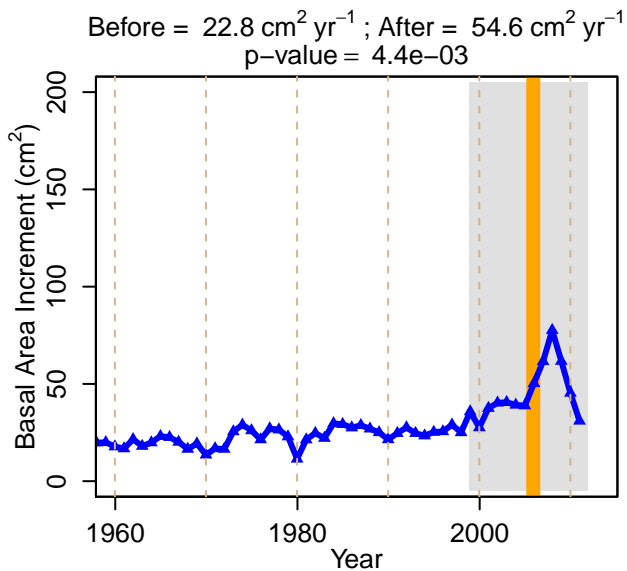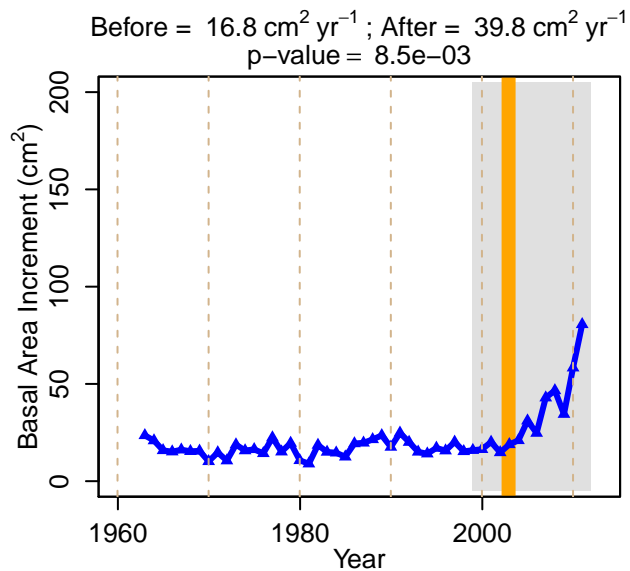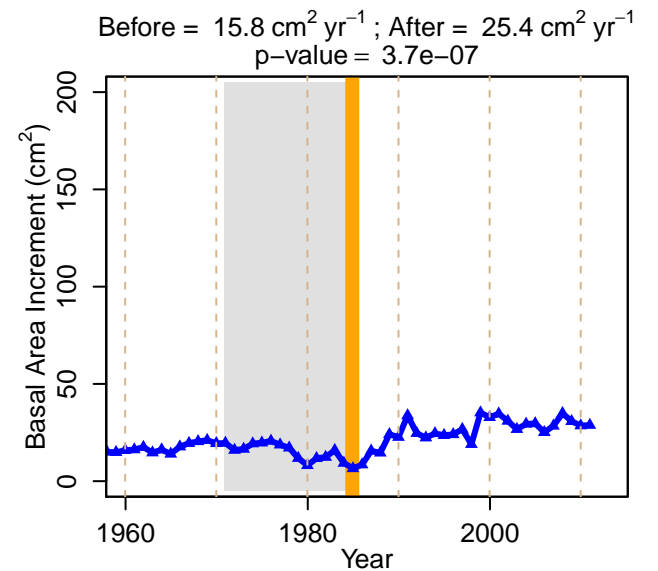

## Typical Response

Before =  $8.8 \text{ cm}^2 \text{ yr}^{-1}$ ; After =  $17.1 \text{ cm}^2 \text{ yr}^{-1}$   
p-value =  $1.9\text{e-}04$

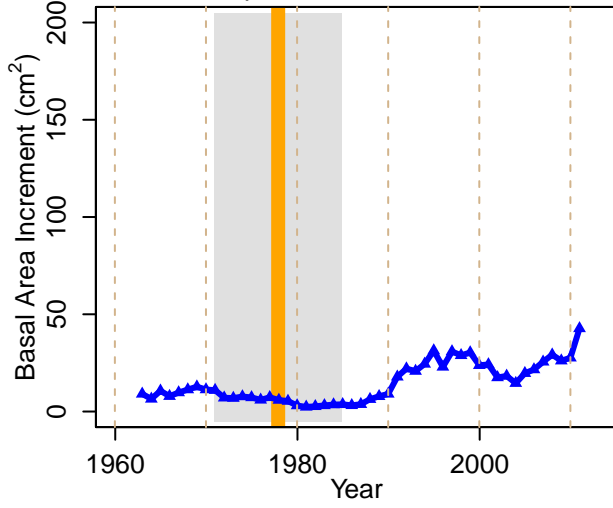

Before =  $33.5 \text{ cm}^2 \text{ yr}^{-1}$ ; After =  $58.7 \text{ cm}^2 \text{ yr}^{-1}$   
p-value =  $2.4\text{e-}04$

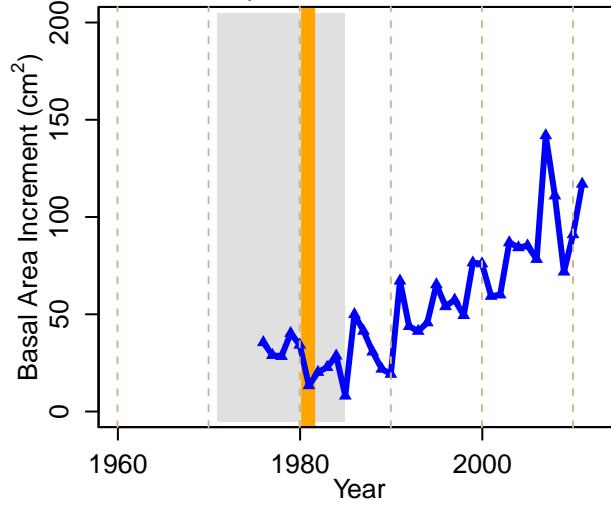

Before =  $13.3 \text{ cm}^2 \text{ yr}^{-1}$ ; After =  $25.8 \text{ cm}^2 \text{ yr}^{-1}$   
p-value =  $5.7\text{e-}09$

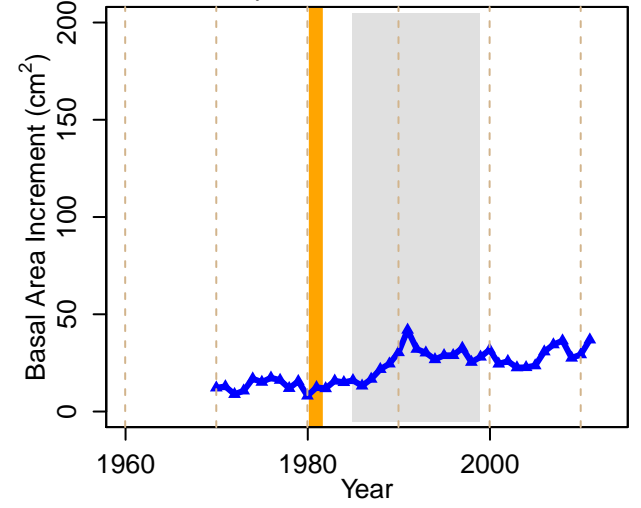

Before =  $7.7 \text{ cm}^2 \text{ yr}^{-1}$ ; After =  $16.4 \text{ cm}^2 \text{ yr}^{-1}$   
p-value =  $1.5\text{e-}12$

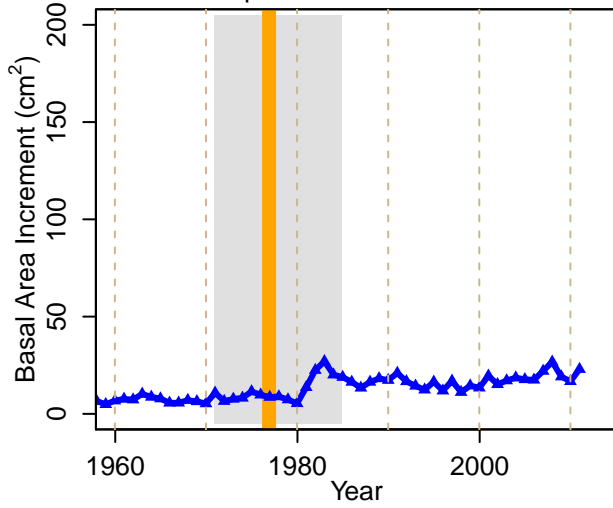

Before =  $28.7 \text{ cm}^2 \text{ yr}^{-1}$ ; After =  $41.1 \text{ cm}^2 \text{ yr}^{-1}$   
p-value =  $1.3\text{e-}04$

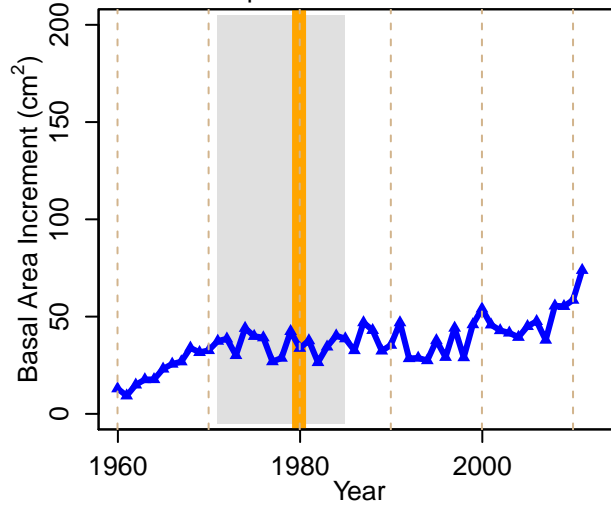

Before =  $9.7 \text{ cm}^2 \text{ yr}^{-1}$ ; After =  $27.3 \text{ cm}^2 \text{ yr}^{-1}$   
p-value =  $1.6\text{e-}05$

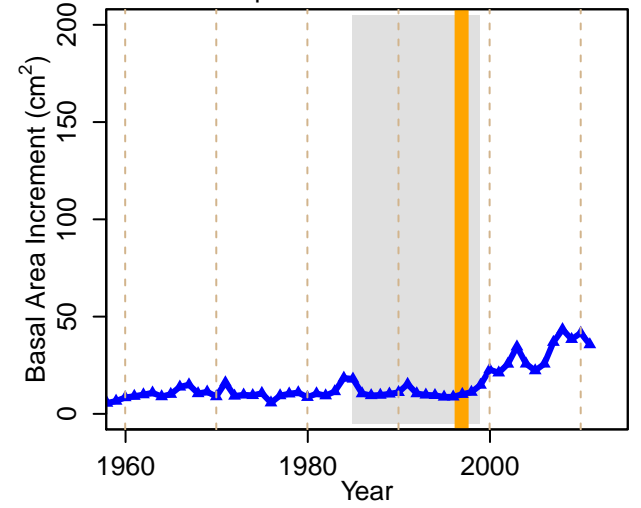

Before =  $20.3 \text{ cm}^2 \text{ yr}^{-1}$ ; After =  $51 \text{ cm}^2 \text{ yr}^{-1}$   
p-value =  $1.2\text{e-}16$

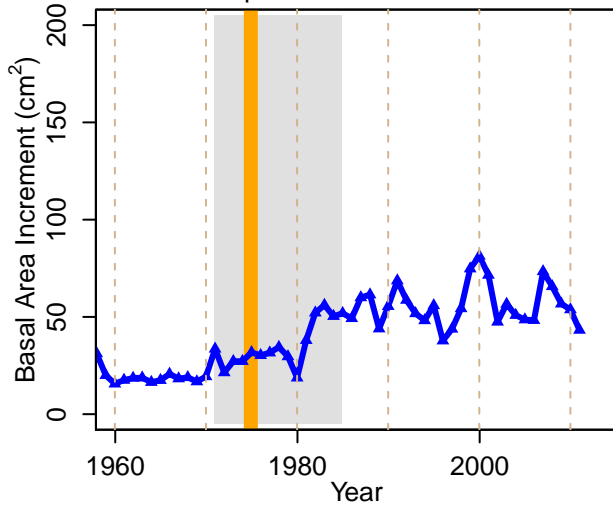

Before =  $21.1 \text{ cm}^2 \text{ yr}^{-1}$ ; After =  $60.2 \text{ cm}^2 \text{ yr}^{-1}$   
p-value =  $1.6\text{e-}14$

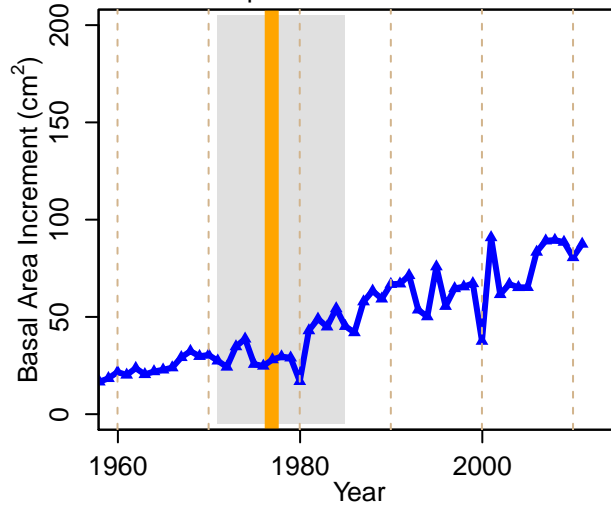

Before =  $24 \text{ cm}^2 \text{ yr}^{-1}$ ; After =  $44.7 \text{ cm}^2 \text{ yr}^{-1}$   
p-value =  $2.3\text{e-}06$

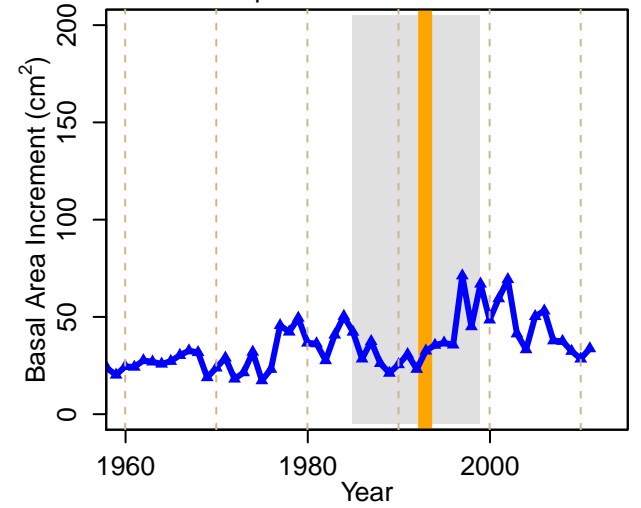

## Typical Response

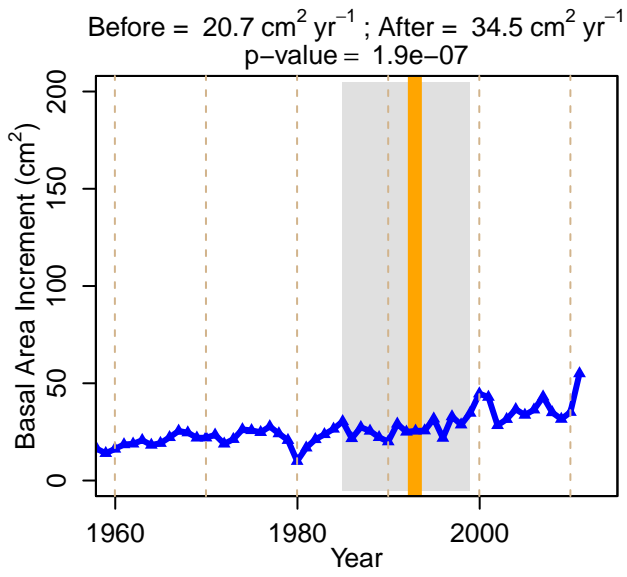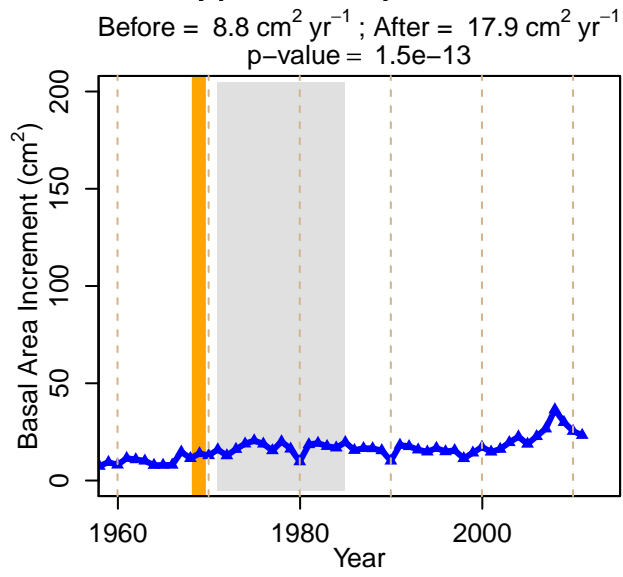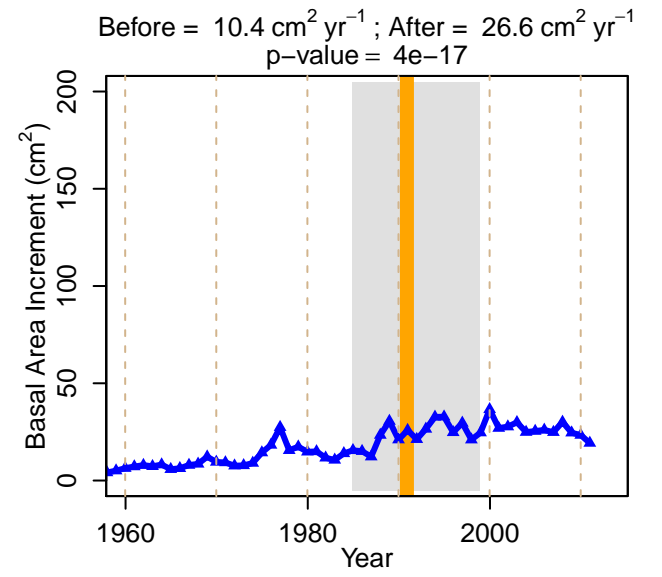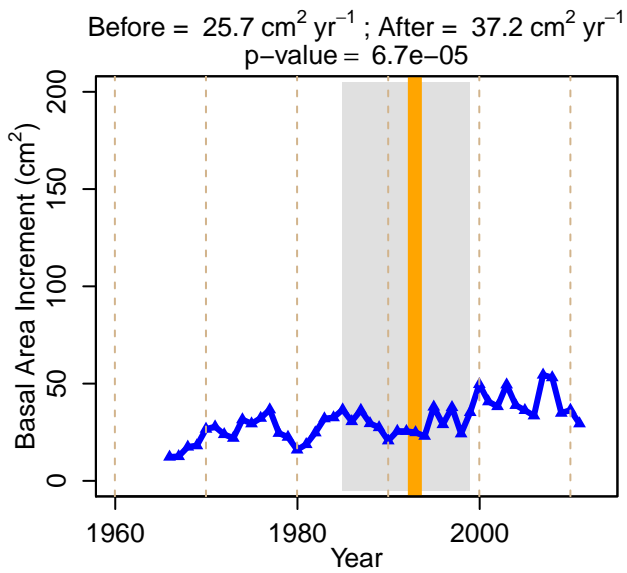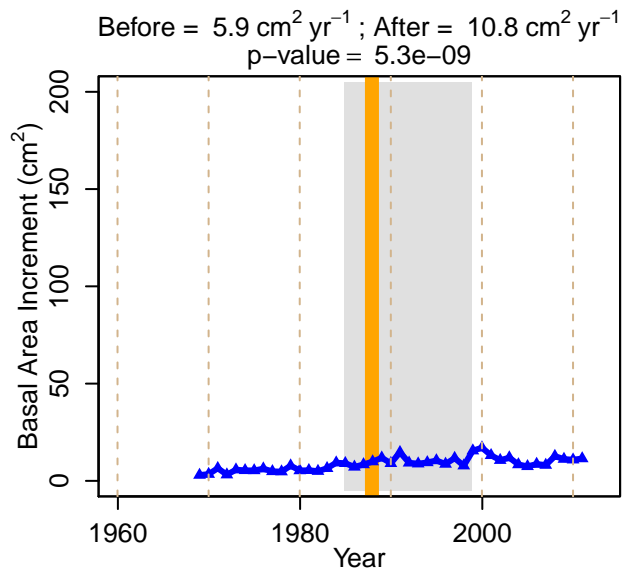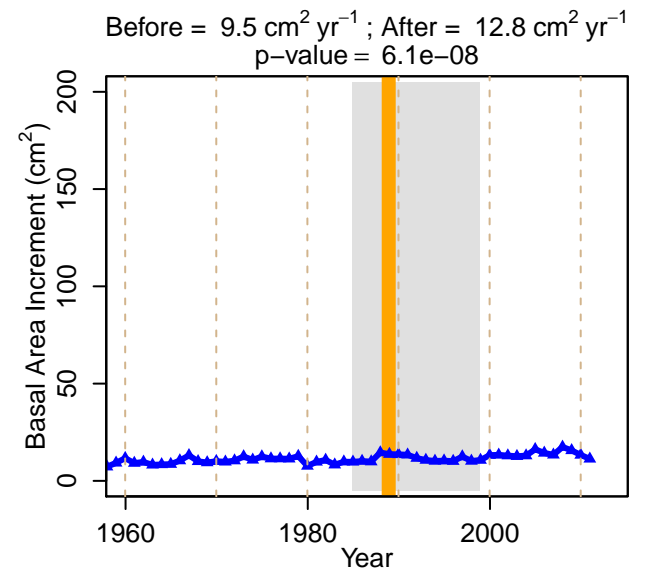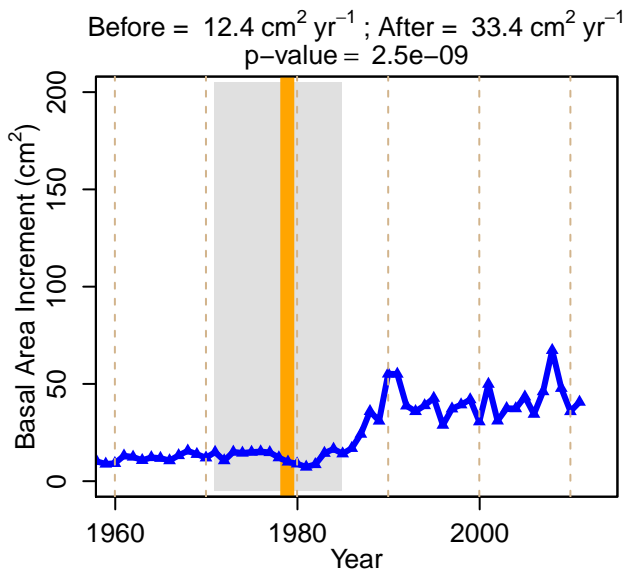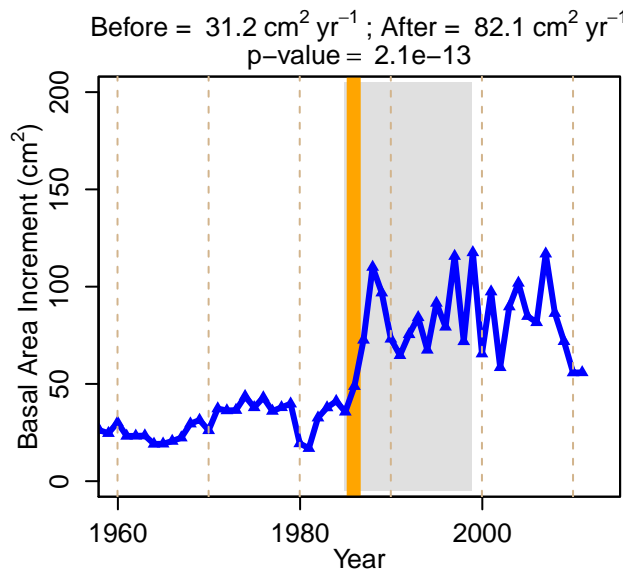

## Negative/No Response

Before =  $48 \text{ cm}^2 \text{ yr}^{-1}$ ; After =  $35.1 \text{ cm}^2 \text{ yr}^{-1}$   
p-value =  $4.6\text{e-}10$

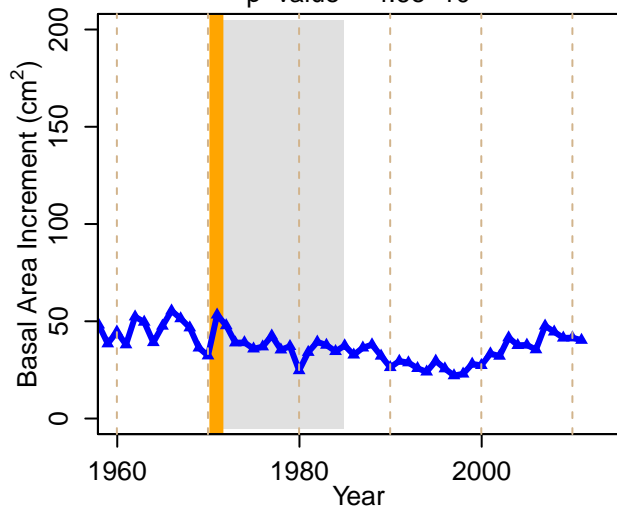

Before =  $35.1 \text{ cm}^2 \text{ yr}^{-1}$ ; After =  $21.3 \text{ cm}^2 \text{ yr}^{-1}$   
p-value =  $1.8\text{e-}09$

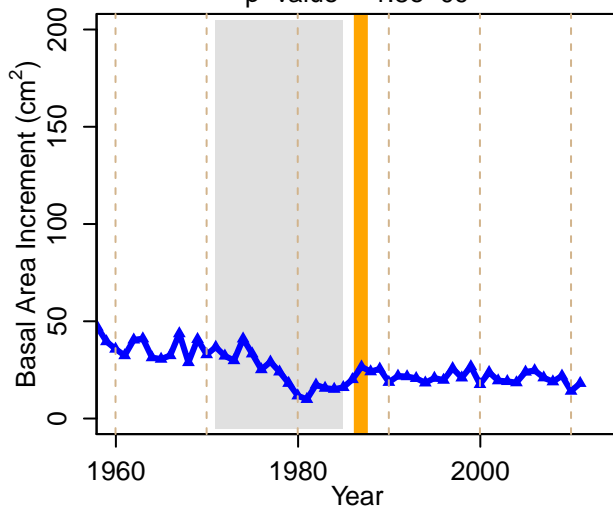

Before =  $37.3 \text{ cm}^2 \text{ yr}^{-1}$ ; After =  $27.8 \text{ cm}^2 \text{ yr}^{-1}$   
p-value =  $1.3\text{e-}02$

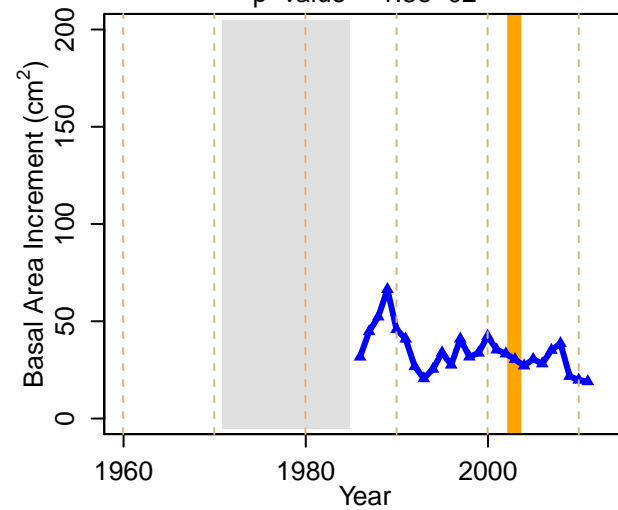

Before =  $25.2 \text{ cm}^2 \text{ yr}^{-1}$ ; After =  $29.2 \text{ cm}^2 \text{ yr}^{-1}$   
p-value = 0.23

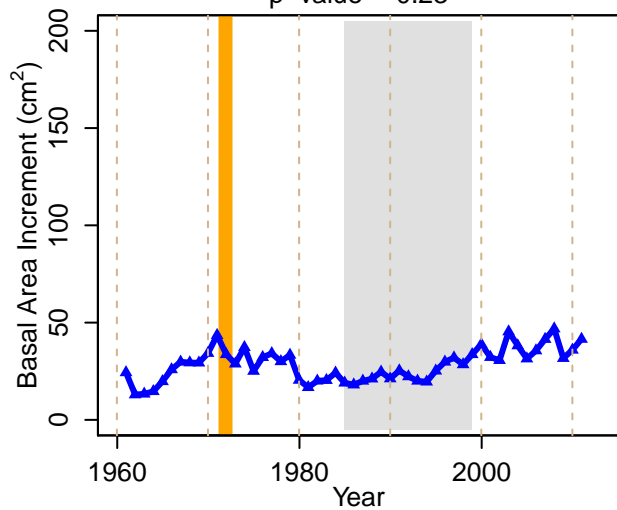

Before =  $20.8 \text{ cm}^2 \text{ yr}^{-1}$ ; After =  $23.1 \text{ cm}^2 \text{ yr}^{-1}$   
p-value = 0.19

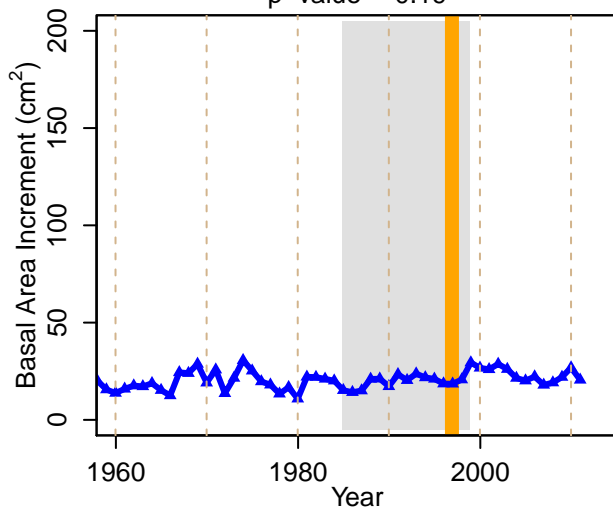

Before =  $58.6 \text{ cm}^2 \text{ yr}^{-1}$ ; After =  $52.8 \text{ cm}^2 \text{ yr}^{-1}$   
p-value = 0.33

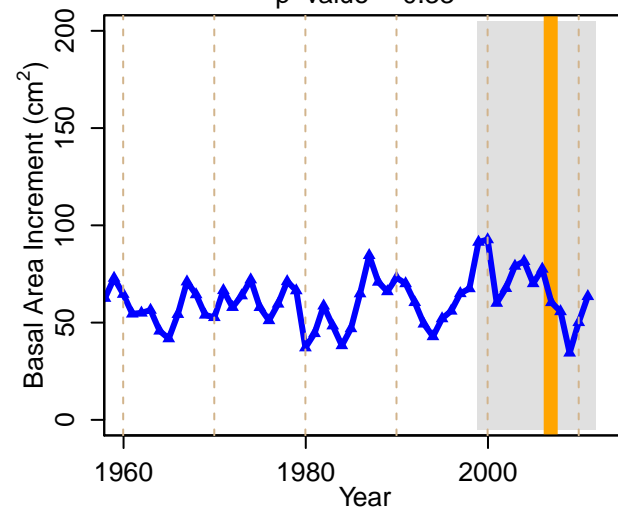

# Stable Urban

Mean BAI =  $26 \text{ cm}^2 \text{ yr}^{-1}$

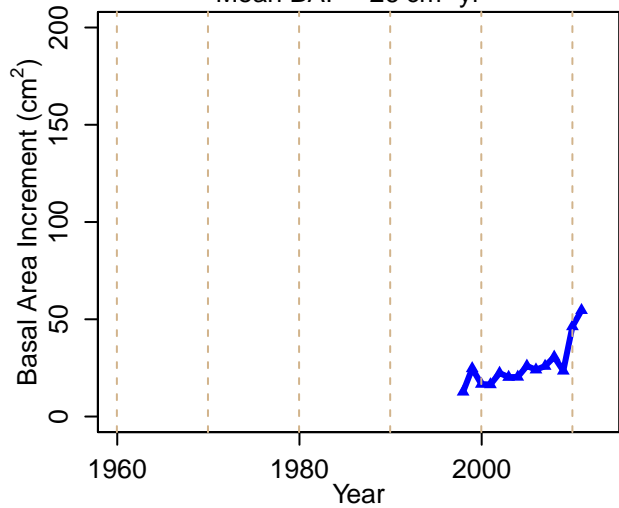

Mean BAI =  $20.9 \text{ cm}^2 \text{ yr}^{-1}$

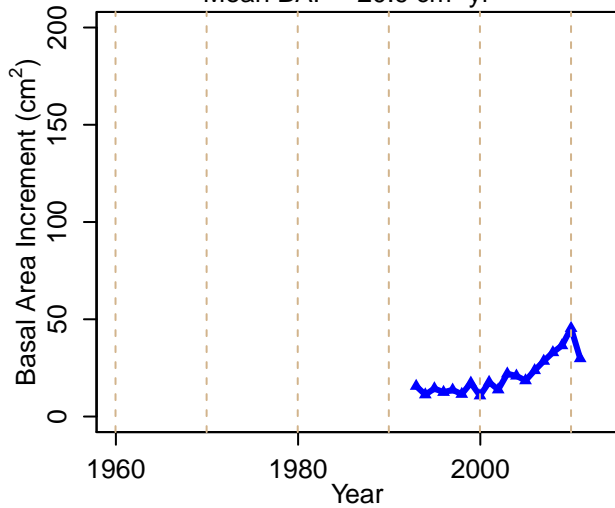

Mean BAI =  $9.7 \text{ cm}^2 \text{ yr}^{-1}$

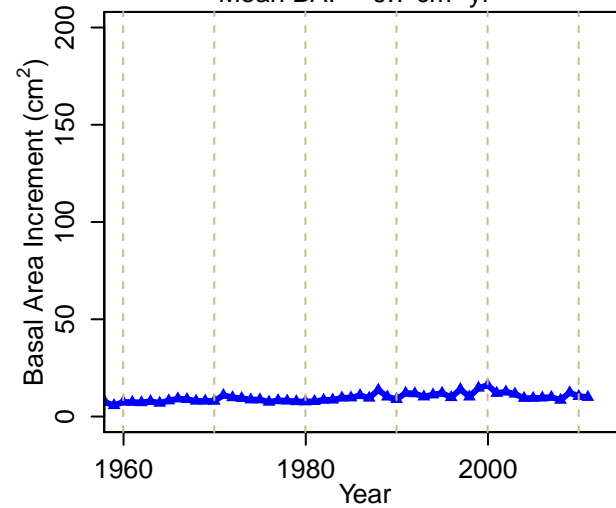

Mean BAI =  $34.2 \text{ cm}^2 \text{ yr}^{-1}$

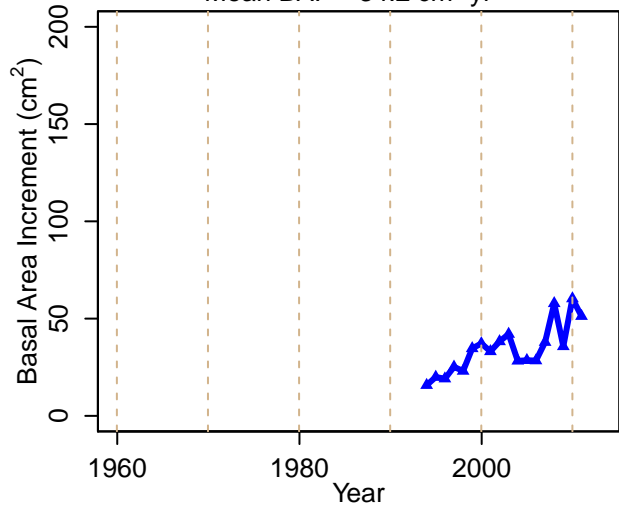

Mean BAI =  $49.1 \text{ cm}^2 \text{ yr}^{-1}$

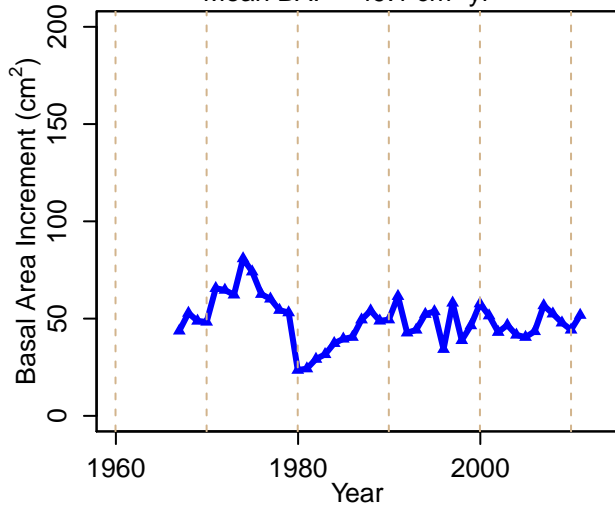

Mean BAI =  $30.3 \text{ cm}^2 \text{ yr}^{-1}$

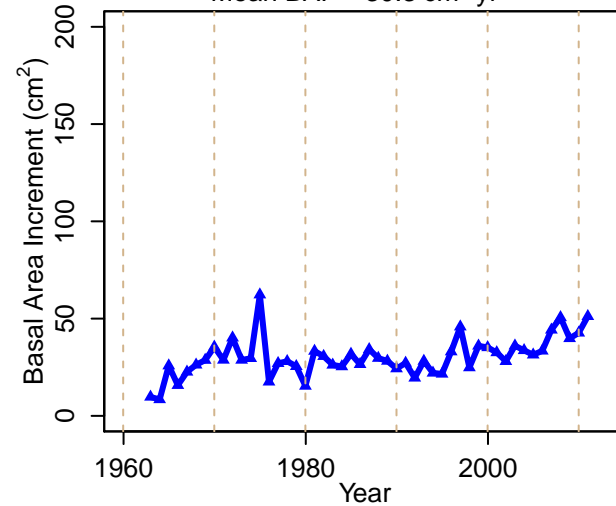

Mean BAI =  $17.3 \text{ cm}^2 \text{ yr}^{-1}$

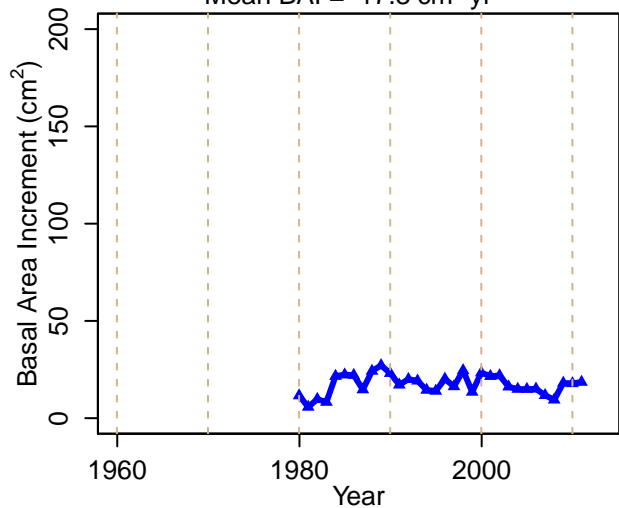

Mean BAI =  $24.6 \text{ cm}^2 \text{ yr}^{-1}$

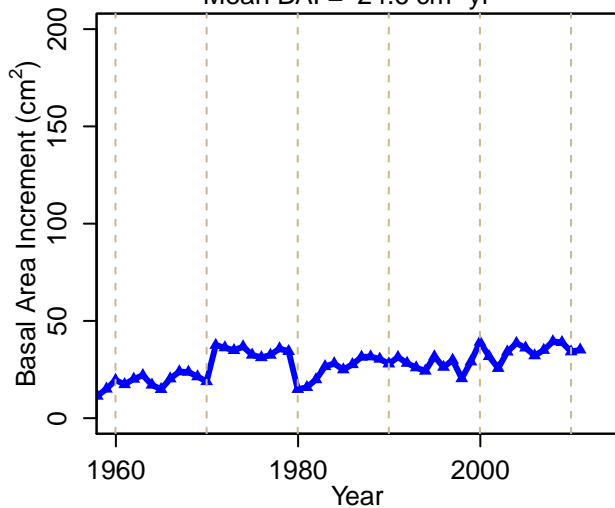

Mean BAI =  $8 \text{ cm}^2 \text{ yr}^{-1}$

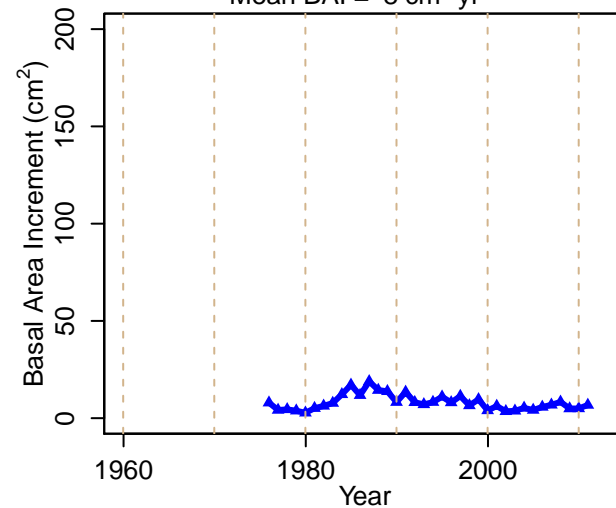



## Stable Urban

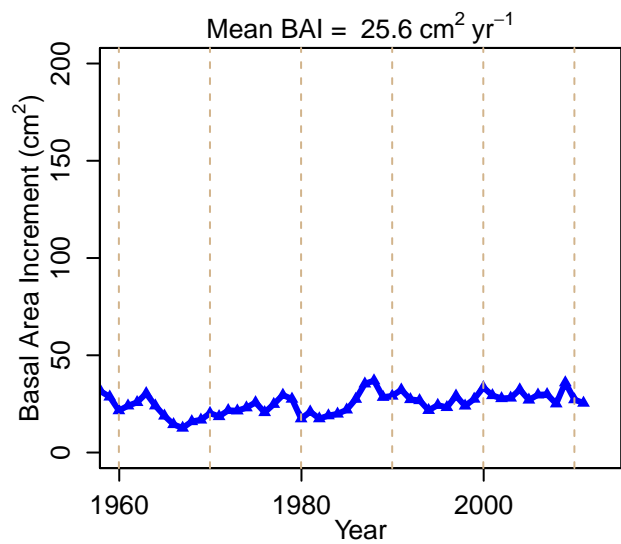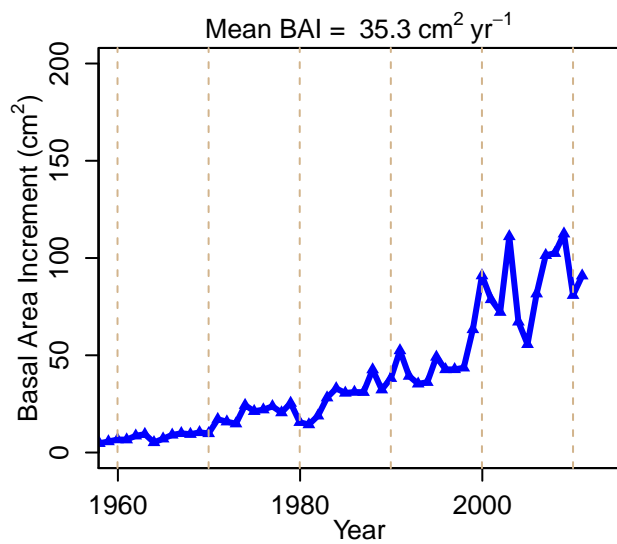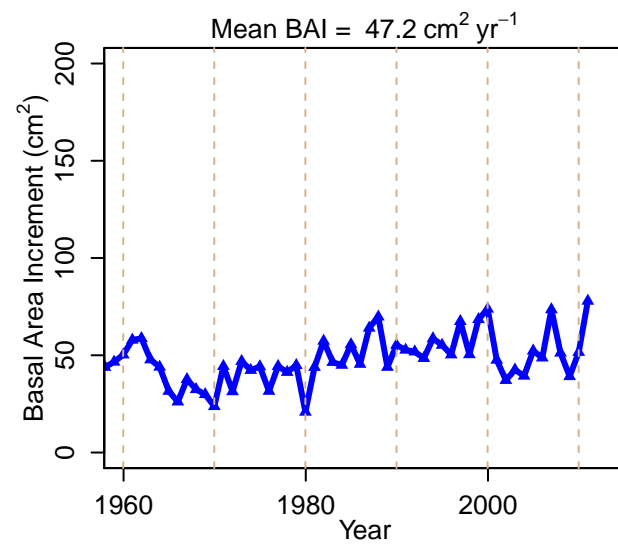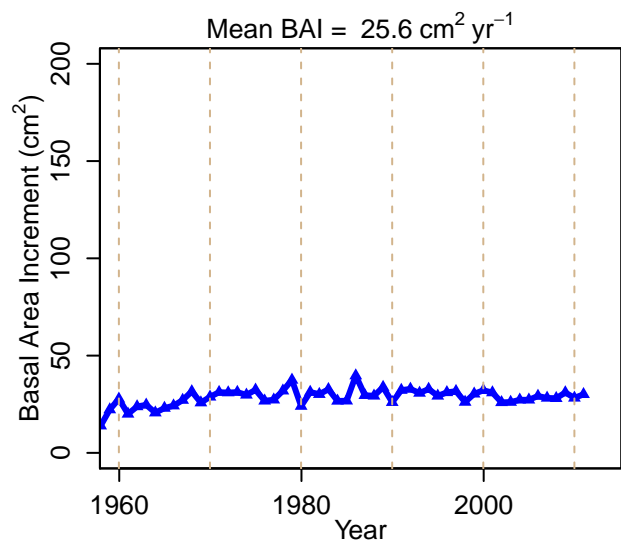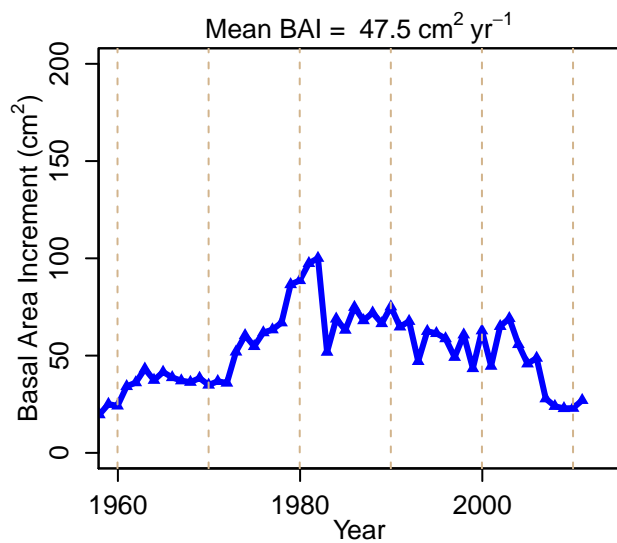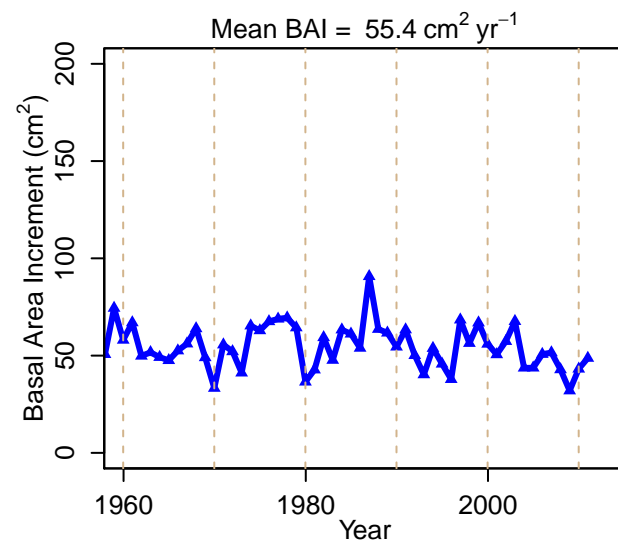

# Boston Street Trees

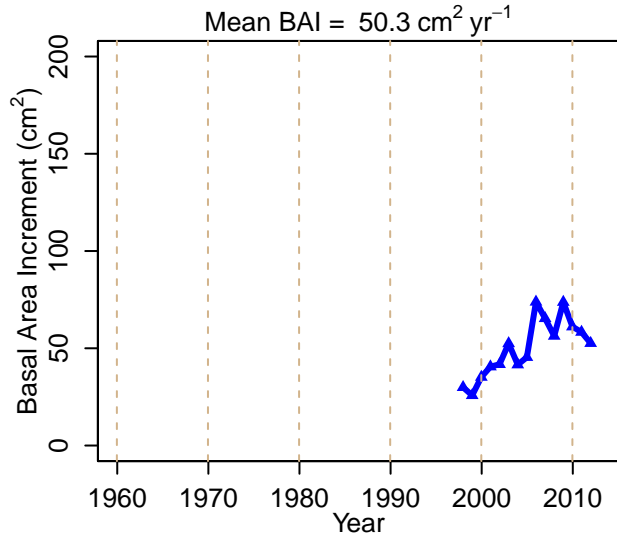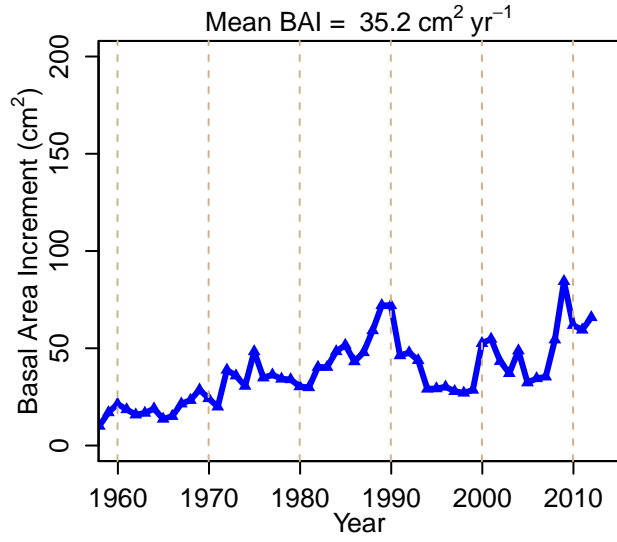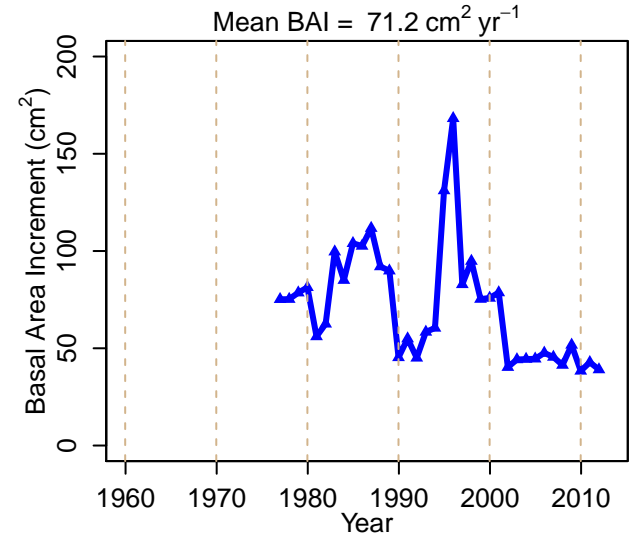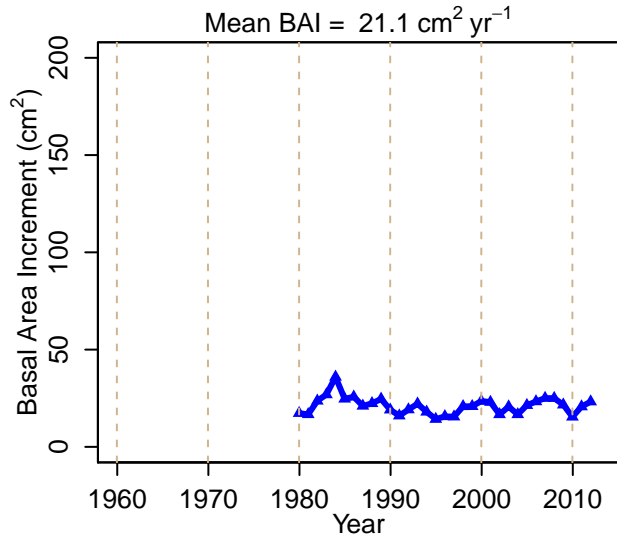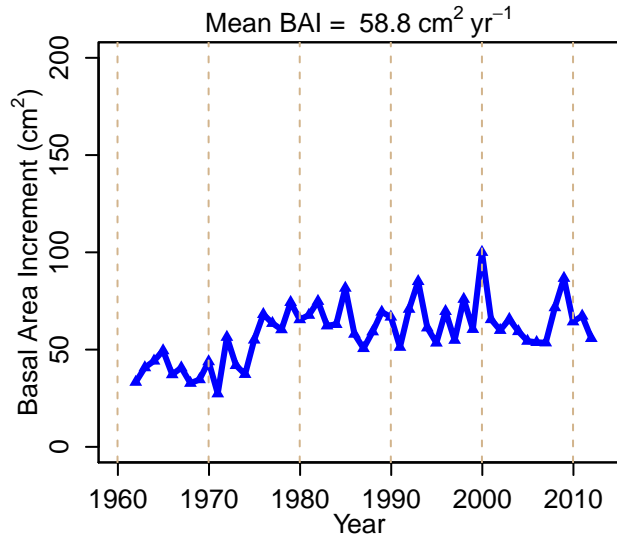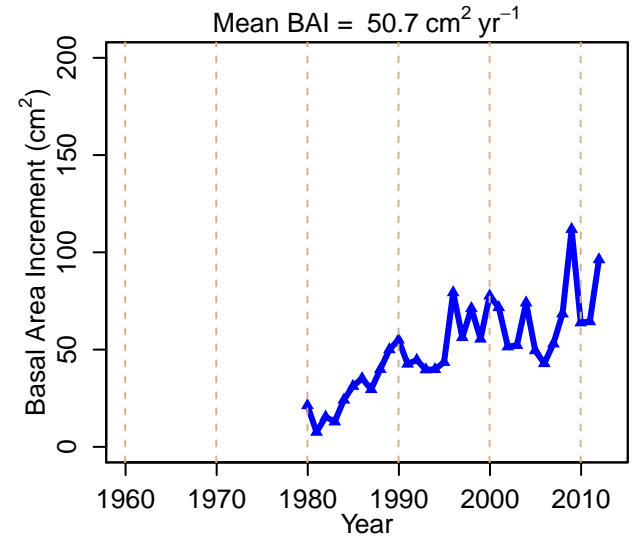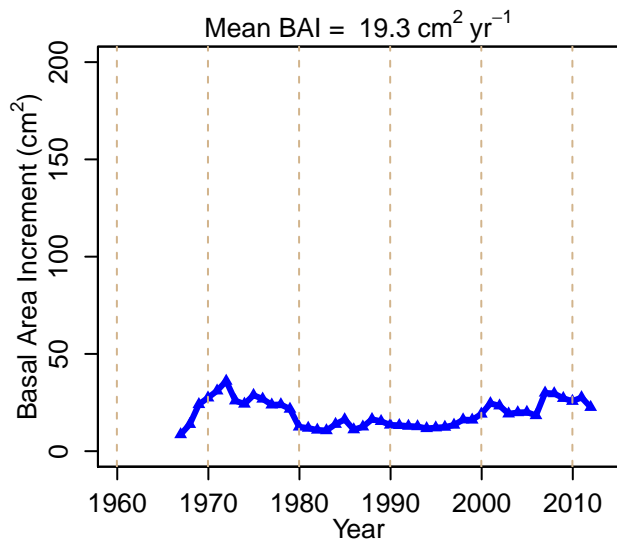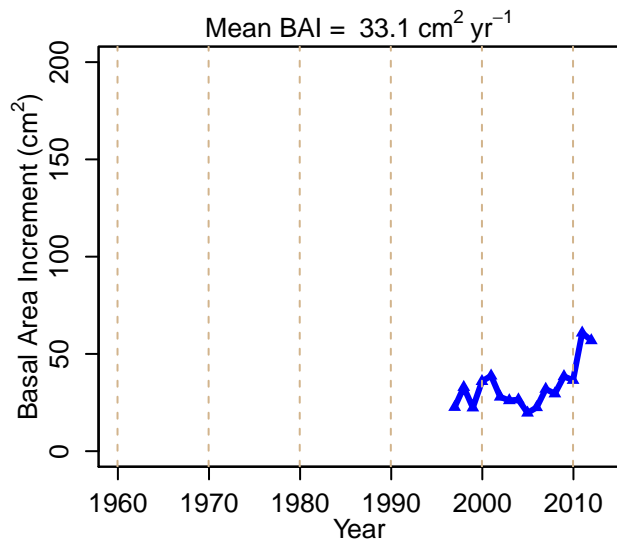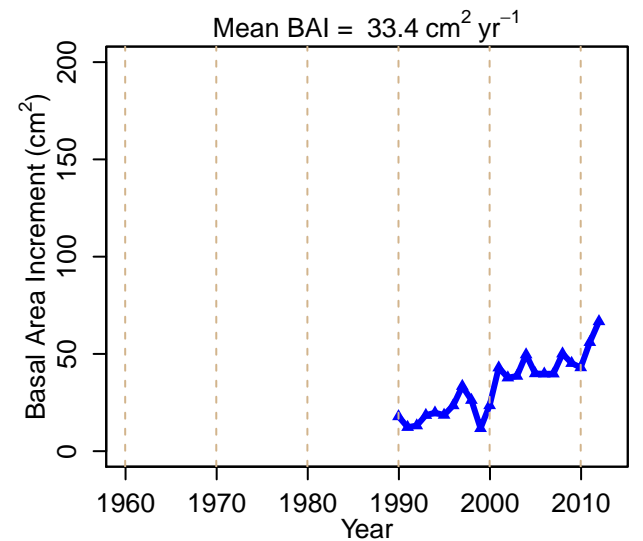

# Boston Street Trees

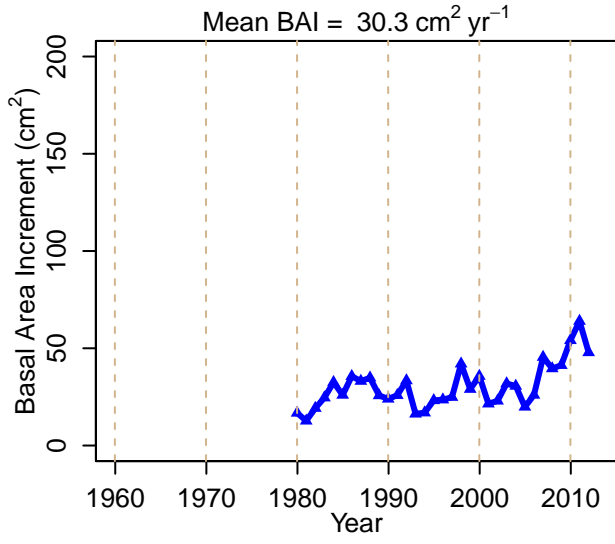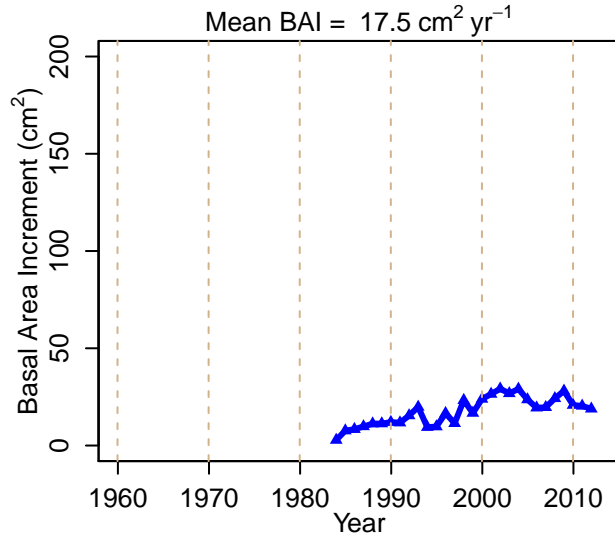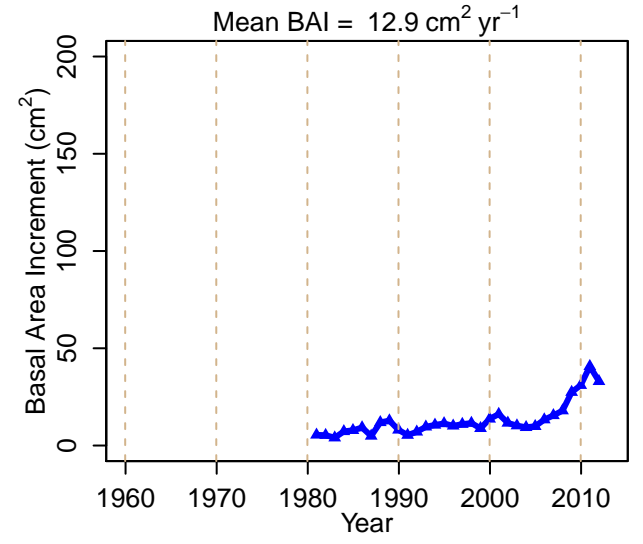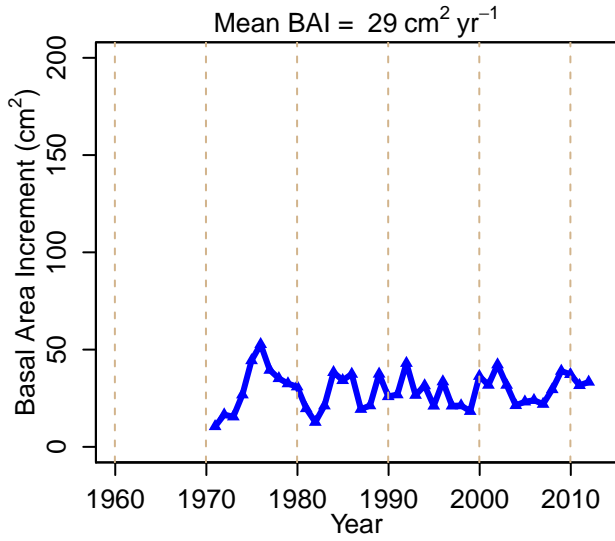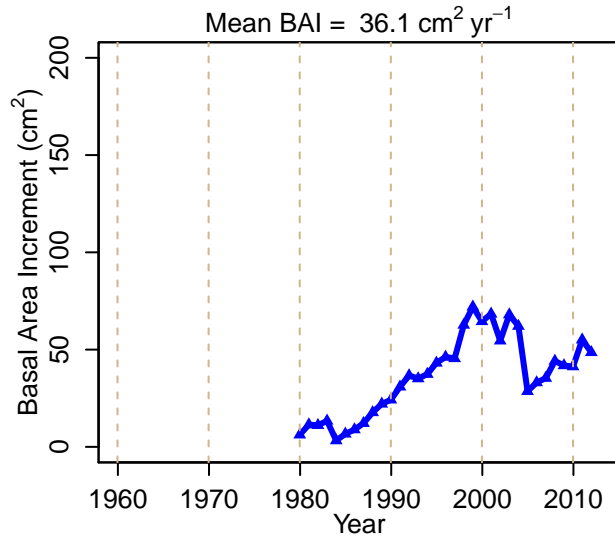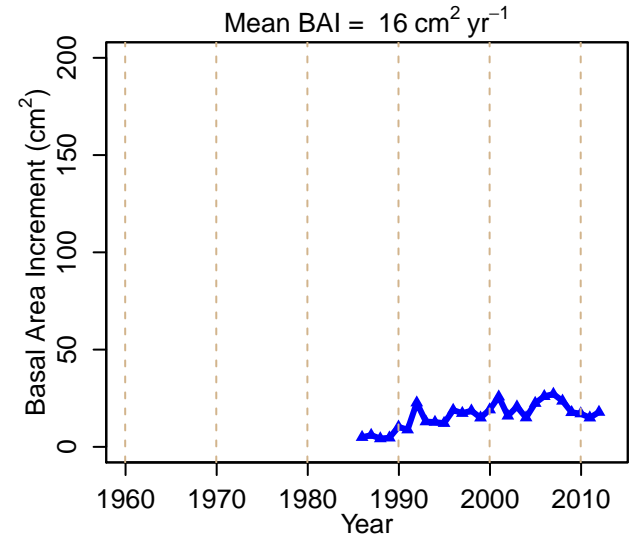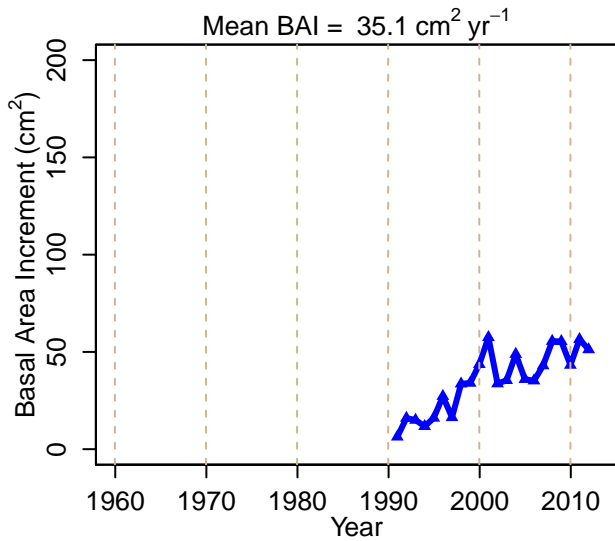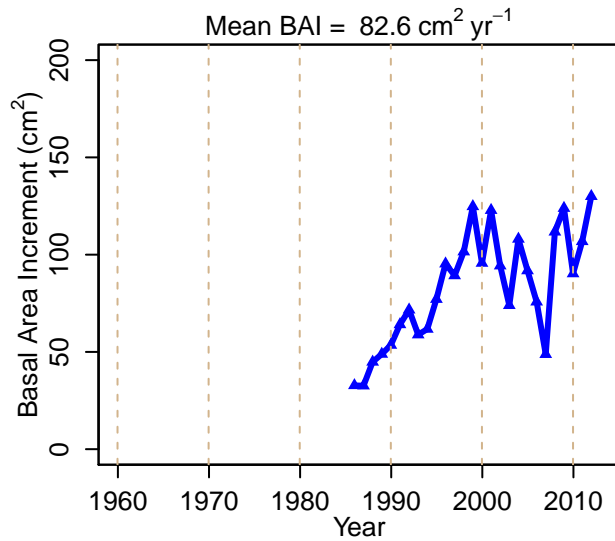

Supplement: pone.0136237.s001.pdf [file pone.0136237.s001.pdf]
