# Supplementary material for: Tree Productivity Enhanced with Conversion from Forest to Urban Land Covers
Source: PLoS One. 2015 Aug 24;10(8):e0136237. doi: 10.1371/journal.pone.0136237 (PMC4547753; doi:10.1371/journal.pone.0136237)
Supplement: S1 Table — A table of all plots used in this analysis, with Massachusetts town name, longitude, latitude, and the number of samples per plot. Note that FIA data locations were confidential, and were not released. For those plots, data were grouped by county. (XLSX) [file pone.0136237.s002.xlsx]

## Sheet: Sheet1
FIA Forest Tree Cores
Location Name	Coordinates	Nu. Of samples
Worcester County	NA	82
Norfolk County	NA	6
Middlesex County	NA	7
Essex County	NA	4
…
Land Cover Change Plots
Location Name	Longitude	Latitude	Nu. Of samples
Pepperell	-71.64	42.65	1
Lunenburg	-71.74	42.63	1
Tewksbury	-71.27	42.62	1
Hopkinton	-71.57	42.2	1
Boxborough	-71.51	42.49	1
Southborough	-71.49	42.32	1
Charlton	-71.93	42.17	1
Tewksbury	-71.24	42.61	1
Tewksbury	-71.23	42.63	1
Dracut	-71.29	42.66	1
Charlton	-71.95	42.13	1
Millbury	-71.81	42.19	1
Westborough	-71.63	42.24	1
Charlton	-71.97	42.16	1
Haverhill	-71.07	42.8	1
Sterling	-71.81	42.42	1
Danvers	-70.95	42.59	1
Franklin	-71.42	42.1	1
Andover	-71.18	42.64	1
Hopedale	-71.55	42.12	1
Stoneham	-71.09	42.47	1
North Andover	-71.11	42.67	1
Northbridge	-71.68	42.13	1
Franklin	-71.42	42.1	1
Natick	-71.33	42.26	1
Milford	-71.55	42.19	1
Gloucester	-70.67	42.63	1
Mendon	-71.51	42.1	1
West Boylston	-71.81	42.36	1
Leominster	-71.74	42.57	1
Upton	-71.61	42.17	1
Bellerica	-71.25	42.53	1
Auburn	-71.81	42.22	1
Essex	-70.82	42.62	1
Bellerica	-71.27	42.53	1
Marlborough	-71.59	42.35	1
Saugus	-71.04	42.47	1
Southborough	-71.53	42.31	1
Sterling	-71.76	42.45	1
Danvers	-70.97	42.59	1
Westford	-71.45	42.59	1
Saugus	-71.03	42.47	1
Bellerica	-71.26	42.53	1
Hudson	-71.56	42.38	1
Westborough	-71.59	42.28	1
Bellerica	-71.26	42.53	1
Gloucester	-70.73	42.63	1
West Newbury	-70.98	42.81	1
Berlin	-71.64	42.4	1
Tynsborough	-71.4	42.68	1
Beverly	-70.86	42.59	1
Townsend	-71.74	42.66	1
Gloucester	-70.7	42.65	1
Ipswich	-70.87	42.67	1
Dracut	-71.27	42.67	1
Westford	-71.42	42.6	1
Tynsborough	-71.4	42.67	1
Methuen	-71.18	42.78	1
Boxborough	-71.53	42.47	1
Westford	-71.44	42.64	1
Bellingham	-71.47	42.08	1
Marlborough	-71.56	42.33	1
Beverly	-70.85	42.58	1
Tynsborough	-71.38	42.68	1
Saugus	-71.01	42.49	1
Topsfield	-70.94	42.65	1
Medfield	-71.3	42.16	1
Beverly	-70.85	42.58	1
Medfield	-71.3	42.16	1
Topsfield	-70.94	42.65	1
Bellerica	-71.26	42.56	1
Natick	-71.31	42.27	1
Natick	-71.31	42.27	1
Westford	-71.47	42.55	1
Medfield	-71.3	42.16	1
Milford	-71.5	42.16	1
Littleton	-71.5	42.54	1
Framingham	-71.39	42.3	1
Waltham	-71.28	42.41	1
Dracut	-71.25	42.71	1
Bedford	-71.3	42.51	1
Bellingham	-71.47	42.07	1
Saugus	-71.03	42.47	1
Bellingham	-71.47	42.07	1
Southborough	-71.55	42.29	1
Pepperell	-71.6	42.66	1
Pepperell	-71.6	42.66	1
Milford	-71.5	42.15	1
Milford	-71.5	42.16	1
Uxbridge	-71.65	42.07	1
Ipswich	-70.87	42.67	1
Rowley	-70.9	42.72	1
Milford	-71.51	42.18	1
Northborough	-71.68	42.33	1
Worcester	-71.81	42.23	1
Acton	-71.41	42.48	1
Foxborough	-71.28	42.08	1
Boxborough	-71.48	42.5	1
Natick	-71.33	42.28	1
Northbridge	-71.68	42.16	1
West Boylston	-71.78	42.33	1
Northbridge	-71.66	42.12	1
Bellingham	-71.48	42.05	1
Northbridge	-71.68	42.16	1
Worcester	-71.81	42.23	1
Lynn	-70.99	42.5	1
West Boylston	-71.77	42.32	1
Acton	-71.42	42.53	1
Northborough	-71.67	42.29	1
Wenham	-70.83	42.59	1
West Boylston	-71.77	42.32	1
Andover	-71.13	42.67	1
Danvers	-70.97	42.59	1
Worcester	-71.81	42.23	1
Worcester	-71.81	42.23	1
Charlton	-71.98	42.14	1
Milford	-71.5	42.16	1
Worcester	-71.81	42.23	1
Millbury	-71.78	42.2	1
Spencer	-72.03	42.22	1
Burlington	-71.19	42.49	1
Wrentham	-71.45	42.02	1
Hudson	-71.6	42.39	1
Worcester	-71.81	42.23	1
Hopkinton	-71.54	42.19	1
Oxford	-71.86	42.08	1
Bellingham	-71.47	42.07	1
Plainville	-71.31	42.03	1
Worcester	-71.77	42.23	1
Millbury	-71.78	42.2	1
North Reading	-71.11	42.59	1
Plainville	-71.31	42.03	1
Franklin	-71.39	42.06	1
Shrewsbury	-71.68	42.28	1
Shrewsbury	-71.68	42.28	1
…
Stable Urban Plots
Location Name	Longitude	Latitude	Nu. Of samples
Worcester	-71.81	42.28	1
Worcester	-71.78	42.28	1
Worcester	-71.81	42.28	1
Worcester	-71.79	42.28	1
Worcester	-71.81	42.27	1
Worcester	-71.81	42.27	1
Boston	-71.15	42.35	1
Framingham	-71.41	42.31	1
Sterling	-71.8	42.47	1
Stow	-71.55	42.43	1
Bolton	-71.63	42.45	1
Milford	-71.54	42.18	1
Northborough	-71.64	42.34	1
Gloucester	-70.73	42.62	1
Chlemsford	-71.32	42.58	1
…
Boston Street Trees
Location Name	Longitude	Latitude	Nu. Of samples
Boston	-71.14	42.25	1
Boston	-71.14	42.25	1
Boston	-71.13	42.24	1
Boston	-71.12	42.25	1
Boston	-71.11	42.27	1
Boston	-71.12	42.28	1
Boston	-71.09	42.3	1
Boston	-71.15	42.29	1
Boston	-71.16	42.29	1
Boston	-71.16	42.3	1
Boston	-71.11	42.32	1
Boston	-71.11	42.32	1
Boston	-71.09	42.34	1
Boston	-71.08	42.33	1
Boston	-71.08	42.34	1
Boston	-71.07	42.35	1
Boston	-71.08	42.34	1
